# Supplementary material
Source: publisher figshare collection journal article supplement (https://acs.figshare.com/ndownloader/files/5727759)

## Supporting Information

### Synthesis of the Guanine $\alpha$ -L-LNA Nucleoside **35** from Furanose **26**

Synthesis of the guanine  $\alpha$ -L-LNA nucleoside **35** is outlined in Scheme S1. Direct coupling of a carbohydrate derivative with guanine-type bases often produces N7/N9 isomeric mixtures that are difficult to separate.<sup>1</sup> In order to avoid the formation of the N7-regioisomer, we applied a slightly modified procedure<sup>2</sup> for the regioselective synthesis of the N9-regioisomeric guanine  $\alpha$ -L-LNA nucleosides. 2-*N*-Acetyl-6-*O*-(diphenylcarbamoyl)guanine<sup>2b</sup> was silylated using *N,O*-bis(trimethylsilyl)acetamide in anhydrous 1,2-dichloroethane. The silylated guanine base was then coupled with the furanose **26** in toluene at 80 °C with trimethylsilyltriflate as Lewis acid affording nucleoside **30** in 59% yield. Selective deacylation of the 2'-*O*-acetyl group to give intermediate **31** in 95% yield was accomplished using half-saturated methanolic ammonia. Subsequent reaction with trifluoromethanesulfonic anhydride in a mixture of pyridine and dichloromethane afforded the 2'-*O*-triflate intermediate according to analytical TLC. Without purification, this intermediate was immediately reacted with potassium acetate in the presence of 18-crown-6 in toluene to yield the C2'-epimeric nucleoside **32** in 46% yield. The 2'-*O*-acetyl group was chemoselectively deacylated using half saturated methanolic ammonia giving compound **33** in 96% yield. Ring closure of nucleoside **33** was performed using sodium hydride in THF at 0 °C. The remaining 5'-*O*-mesyl group was subsequently substituted with an acetate group by reaction with potassium acetate in the presence of 18-crown-6 in dioxane. The crude product obtained was then directly subjected to treatment with saturated methanolic ammonia at room temperature to give nucleoside **34**

in 35% yield from **33**. The C2 exocyclic amino group of **34** was protected using a transient protection protocol (*O*-trimethylsilylation with chlorotrimethylsilane in pyridine, 2-*N*-protection with isobutyric anhydride, and desilylation) to give nucleoside **35** in 72% yield. Attempted debenzoylation of **35** with ammonium formate and Pd/C gave a mixture of several products (according to analytical TLC and NMR spectroscopy) which in our hands proved impossible to separate.

**Scheme S1.**<sup>a</sup> Synthesis of the  $\alpha$ -L-LNA Guanine Nucleoside **35**

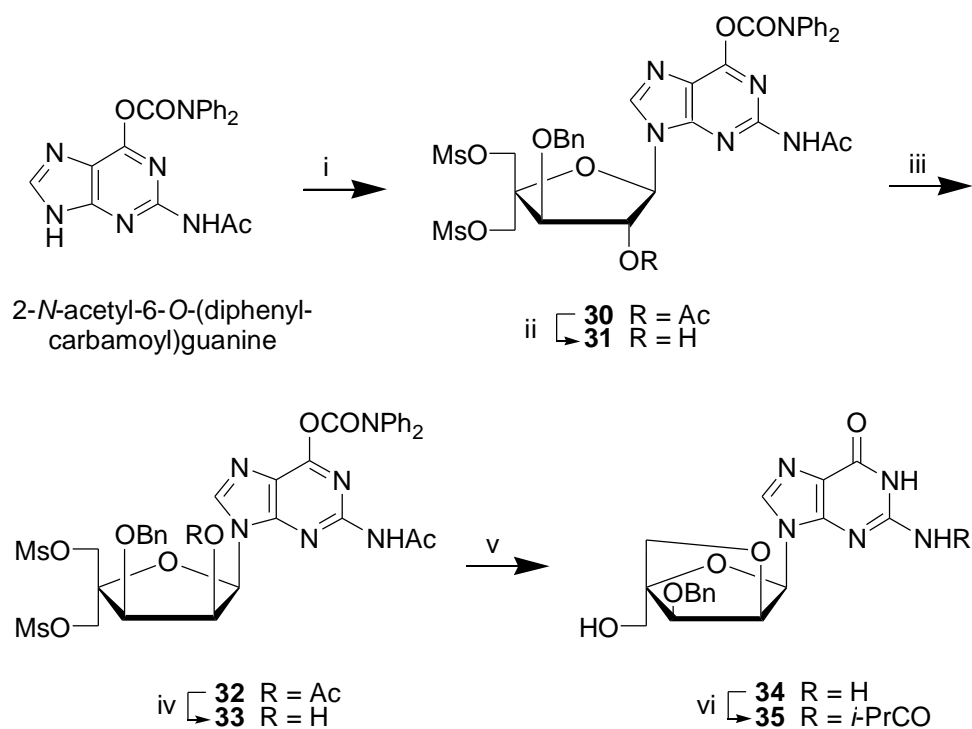

<sup>a</sup> *Reagents, conditions and yields:* (i) a) BSA, DCE, 80 °C; b) **26**, TMSOTf, toluene, 80 °C (59%); (ii) half-sat. NH<sub>3</sub> in MeOH, 0 °C (95%); (iii) a) Tf<sub>2</sub>O, pyridine, CH<sub>2</sub>Cl<sub>2</sub>, -30 °C; b) KOAc, 18-crown-6, toluene, 80 °C (46%); (iv) half-sat. NH<sub>3</sub> in MeOH, 0 °C (96%); (v) a) 18-crown-6, toluene, 80 °C (46%); b) **26**, TMSOTf, toluene, 80 °C (59%).

NaH, THF, 0 °C; b) KOAc, 18-crown-6, dioxane, 80 °C; c) sat. NH<sub>3</sub> in MeOH, rt (35%);

(vi) a) TMSCl, pyridine, rt; b) (*i*-PrCO)<sub>2</sub>O, pyridine, rt (72%).

## References

1. Imazawa, M.; Eckstein, F. *J. Org. Chem.* **1978**, *43*, 3044.
2. (a) Zou, R.; Robins, M. J. *Can. J. Chem.* **1987**, *65*, 1436. (b) Robins, M. J.; Zou, R.; Guo, Z.; Wnuk, S. F. *J. Org. Chem.* **1996**, *61*, 9207.

## Experimental Procedures for Conversion of Furanose **26** into Nucleoside **35**

**9-(2-*O*-Acetyl-3-*O*-benzyl-5-*O*-methanesulfonyl-4-*C*-methanesulfonyloxymethyl-*α*-L-threo-pentofuranosyl)-2-*N*-acetyl-6-*O*-(diphenylcarbamoyl)guanine (**30**).** *N,O*-Bis(trimethylsilyl)acetamide (2.74 mL, 11.2 mmol) was added to a suspension of 2-*N*-acetyl-6-*O*-(diphenylcarbamoyl)guanine<sup>2b</sup> (3.29 g, 8.48 mmol) in anhydrous 1,2-dichloroethane (280 mL), and stirring was continued at 80 °C for 15 min. The clear solution was evaporated to dryness under reduced pressure, the residue was dissolved in anhydrous toluene (60 mL), and TMS-triflate (1.53 mL, 8.47 mmol) followed by a solution of furanose **26** (2.88 g, 5.65 mmol) in anhydrous toluene (60 mL) were added. The mixture was stirred at 80 °C for 1 h and then cooled to room temperature whereupon EtOAc (100 mL) was added. The resulting mixture was washed successively with a saturated aqueous solution of NaHCO<sub>3</sub> (80 mL) and brine (80 mL), dried (Na<sub>2</sub>SO<sub>4</sub>), and evaporated to dryness under reduced pressure. The residue was purified by silica gel column chromatography using MeOH/CH<sub>2</sub>Cl<sub>2</sub> (0-5% MeOH, v/v) as eluent yielding nucleoside **30** (2.77 g, 59%) as

a clear oil. FAB-MS  $m/z$  839  $[M + H]^+$ ;  $^1H$  NMR ( $CDCl_3$ )  $\delta$  8.17 (s, 1H), 8.01 (s, 1H), 7.37-7.14 (m, 15H), 6.17 (s, 1H), 5.81 (s, 1H), 4.40 (m, 7H), 2.92 (s, 3H), 2.91 (s, 3H), 2.39 (s, 3H), 2.07 (s, 3H);  $^{13}C$  NMR ( $CDCl_3$ )  $\delta$  195.5, 169.4, 156.3, 154.3, 152.3, 150.2, 141.9, 135.8, 129.5, 129.4, 129.2, 128.8, 128.6, 128.4, 128.4, 127.4, 127.2, 127.0, 120.9, 87.6, 86.0, 81.2, 79.2, 67.3, 65.5, 37.7, 37.6, 25.1, 20.6.

**2-*N*-Acetyl-9-(3-*O*-benzyl-5-*O*-methanesulfonyl-4-*C*-(methanesulfonyloxymethyl)-*a*-L-threo-pentofuranosyl)-6-*O*-(diphenylcarbamoyl)guanine (31).** To a solution of nucleoside **30** (3.62 g, 4.32 mmol) in MeOH (25 mL) was added a saturated solution of  $NH_3$  in MeOH (25 mL). The solution was stirred at 0 °C for 30 min and evaporated to dryness. The residue was coevaporated with toluene (2 x 20 mL) and purified by silica gel column chromatography using MeOH/ $CH_2Cl_2$  (0-5% MeOH, v/v) as eluent yielding nucleoside **31** (3.29 g, 95%) as a white foam. FAB-MS  $m/z$  797  $[M + H]^+$ ;  $^1H$  NMR ( $CDCl_3$ )  $\delta$  8.61 (s, 1H), 8.21 (s, 1H), 7.44-7.22 (m, 15H), 6.21 (s, 1H), 6.08 (d, 1H,  $J$  5.7 Hz), 4.97-4.26 (m, 8H), 2.98 (s, 3H, Ms), 2.83 (s, 3H, Ms), 2.07 (s, 3H, NHAc);  $^{13}C$  NMR ( $CDCl_3$ )  $\delta$  168.9, 155.9, 153.9, 151.1, 150.5, 142.3, 137.0, 129.2, 129.0, 128.7, 128.5, 128.4, 128.2, 128.1, 127.5, 127.4, 127.1, 126.9, 121.0, 89.3, 83.2, 82.5, 79.6, 73.2, 68.1, 37.5, 37.3, 24.8.

**9-(2-*O*-Acetyl-3-*O*-benzyl-5-*O*-methanesulfonyl-4-*C*-(methanesulfonyloxymethyl)-*a*-L-erythro-pentofuranosyl)-2-*N*-acetyl-6-*O*-(diphenylcarbamoyl)guanine (32).** Nucleoside **31** (1.20 g, 1.51 mmol) was coevaporated with anhydrous pyridine (2 x 10 mL), and the residue was dissolved in a mixture of anhydrous  $CH_2Cl_2$  (30 mL) and anhydrous pyridine (6 mL). The reaction mixture was cooled to -30 °C and trifluoromethanesulfonic

anhydride (0.68 mL, 4.07 mmol) was added dropwise under stirring. After 2 h, the mixture was diluted by addition of CH<sub>2</sub>Cl<sub>2</sub> (100 mL), and washing was performed using a saturated aqueous solution of NaHCO<sub>3</sub> (100 mL). The separated organic phase was dried (Na<sub>2</sub>SO<sub>4</sub>) and evaporated to dryness under reduced pressure. The residue was coevaporated using anhydrous toluene (2 x 20 mL) and dissolved in anhydrous toluene (45 mL). KOAc (0.74 g, 2.53 mmol) and 18-crown-6 (1.4 g, 5.27 mmol) were added and the reaction mixture was stirred for 40 min at 80 °C. The reaction mixture was evaporated to dryness under reduced pressure, and the residue was purified by silica gel column chromatography using MeOH/CH<sub>2</sub>Cl<sub>2</sub> (0-5% MeOH, v/v) as eluent affording nucleoside **32** (0.59 g, 46%) as a yellowish oil. FAB-MS *m/z* 839 [M + H]<sup>+</sup>; <sup>1</sup>H NMR (CDCl<sub>3</sub>) δ 8.44 (s, 1H), 8.26 (s, 1H), 7.44-7.25 (m, 15H), 6.60 (d, 1H, *J* 4.1 Hz), 5.69 (m, 1H), 4.80-4.30 (m, 7H), 3.04 (s, 3H), 2.99 (s, 3H), 2.48 (s, 3H), 2.02 (s, 3H); <sup>13</sup>C NMR (CDCl<sub>3</sub>) δ 187.2, 168.2, 151.1, 154.7, 152.3, 150.2, 143.2, 141.6, 136.0, 129.2, 128.8, 128.7, 128.4, 127.3, 127.2, 127.0, 126.6, 126.4, 120.2, 82.5, 82.2, 78.4, 74.7, 70.5, 68.1, 67.7, 37.9, 37.7, 25.1, 20.4.

**2-*N*-Acetyl-9-(3-*O*-benzyl-5-*O*-methanesulfonyl-4-*C*-(methanesulfonyloxymethyl)-*a*-L-erythro-pentofuranosyl)-6-*O*-(diphenylcarbamoyl)guanine (33).** To a stirred solution of nucleoside **32** (1.50 g, 1.79 mmol) in MeOH (28 mL) was added a saturated solution of NH<sub>3</sub> in MeOH (28 mL) at 0 °C. The solution was stirred at 0 °C for 30 min and then evaporated to dryness under reduced pressure. The residue was coevaporated with toluene (2 x 10 mL) and purified by silica gel column chromatography using MeOH/CH<sub>2</sub>Cl<sub>2</sub> (0-5% MeOH, v/v) as eluent yielding nucleoside **33** (1.38 g, 96%) as a yellowish solid material which was used in the next step without further purification. FAB-

MS  $m/z$  797  $[M + H]^+$ ;  $^1H$  NMR ( $(CD_3)_2SO$ )  $\delta$  10.72 (s, 1H,  $D_2O$  exchangeable), 8.53 (s, 1H), 7.52-7.31 (m, 15H), 6.44 (d, 1H,  $J$  4.3 Hz), 6.19 (d, 1H,  $D_2O$  exchangeable,  $J$  5.1 Hz), 4.80-4.40 (m, 8H), 3.26 (s, 3H), 3.25 (s, 3H), 2.20 (s, 3H);  $^{13}C$  NMR ( $(CD_3)_2SO$ )  $\delta$  168.2, 154.7, 152.3, 150.2, 145.1, 141.7, 137.6, 129.6, 128.5, 128.0, 127.9, 127.4, 127.1, 127.0, 119.6, 83.9, 82.1, 79.5, 72.6, 69.1, 68.9, 68.9, 37.1, 36.9, 24.6.

**(1R,3R,4S,7R)-7-Benzoyloxy-3-(guanine-9-yl)-1-hydroxymethyl-2,5-dioxabicyclo[2.2.1]heptane (34).** Nucleoside **33** (0.57 g, 0.72 mmol) was coevaporated with anhydrous toluene (2 x 10 mL) and dissolved in anhydrous THF (18 mL). The solution was cooled to 0 °C and NaH (31 mg, 0.79 mmol) was added. The reaction mixture was stirred at 0 °C for 1h and then evaporated to dryness under reduced pressure. The residue was dissolved in dichloromethane (50 mL), and extraction was performed using a saturated aqueous solution of  $NaHCO_3$  (20 mL). The separated organic phase was dried ( $Na_2SO_4$ ) and evaporated to dryness under reduced pressure. The residue was dissolved in 1,4-dioxane (18 mL) whereupon KOAc (0.35 g, 3.60 mmol) and 18-crown-6 (0.38 g, 1.44 mmol) were added. The reaction mixture was stirred for 18 h at 80 °C and then evaporated to dryness under reduced pressure. A saturated solution of  $NH_3$  in MeOH (25 mL) was added and stirring was continued for 24 h at room temperature. The reaction mixture was evaporated to dryness under reduced pressure, and the residue was coevaporated with toluene (2 x 20 mL) and purified by silica gel column chromatography using MeOH/AcOEt (0-15% MeOH, v/v) as eluent affording nucleoside **34** (96 mg, 35%) as a white solid material. FAB-MS  $m/z$  386  $[M + H]^+$ ;  $^1H$  NMR ( $(CD_3)_2SO$ )  $\delta$  7.89 (s, 1H), 7.39-7.30 (m, 8H), 6.06 (s, 1H), 4.68 (d, 2H,  $J$  3.0 Hz), 4.63 (s, 1H), 4.36 (s, 1H), 4.07-3.99 (m, 2H),

3.70-3.55 (m, 3H);  $^{13}\text{C}$  NMR ( $(\text{CD}_3)_2\text{SO}$ )  $\delta$  174.3, 155.5, 151.4, 137.9, 134.3, 128.3, 127.6, 127.5, 89.4, 82.9, 79.6, 76.7, 73.0, 71.0, 69.4.

**(1R,3R,4S,7R)-7-Benzoyloxy-1-hydroxymethyl-3-(2-N-isobutyrylguanin-9-yl)-2,5-dioxabicyclo[2.2.1]heptane (35).** To nucleoside **34** (0.14 g, 0.36 mmol) dissolved in anhydrous pyridine (4 mL) was added chlorotrimethylsilane (0.45 mL, 3.58 mmol). After stirring for 15 min, isobutyric anhydride (0.59 mL, 3.58 mmol) was added and the mixture was stirred for 3 h at room temperature. The mixture was subsequently cooled to 0 °C and a saturated aqueous solution of  $\text{NaHCO}_3$  (10 mL) was added. The mixture was stirred for 15 min at room temperature and then extracted with AcOEt (15 mL). The separated organic phase was washed with brine (10 mL), dried ( $\text{Na}_2\text{SO}_4$ ) and evaporated to dryness under reduced pressure. The residue was coevaporated with toluene (2 x 10 mL) and purified by silica gel column chromatography using MeOH/AcOEt (0-15%, v/v) as eluent yielding nucleoside **35** (0.12 g, 72%) as a white solid material. FAB-MS  $m/z$  456  $[\text{M} + \text{H}]^+$ ;  $^1\text{H}$  NMR ( $\text{CD}_3\text{OD}$ )  $\delta$  8.05 (s, 1H), 7.36 (s, 1H), 7.32-7.20 (m, 6H), 6.04 (s, 1H), 4.60 (s, 2H), 4.47 (s, 1H), 4.23 (s, 1H), 4.06 (d, 1H,  $J$  8.4 Hz), 3.91 (d, 1H,  $J$  8.2 Hz), 3.78 (s, 2H), 3.52 (s, 1H), 2.51 (q, 1H,  $J$  7.0 Hz), 1.1 (m, 6H);  $^{13}\text{C}$  NMR ( $\text{CD}_3\text{OD}$ )  $\delta$  179.7, 155.6, 148.4, 147.8, 137.5, 136.7, 128.1, 127.7, 127.2, 119.5, 89.8, 84.5, 79.0, 72.9, 71.8, 69.7, 57.0, 35.5, 18.3, 18.2.

**Copies of  $^{13}\text{C}$  NMR spectra of Compounds 7, 8, 11, 14, 16, 19, 20, 21, 22, 26, 27, 28, 29, 30, 31, 32, 34 and 35, copies of selected NOE spectra of compound 20, and copies of  $^{31}\text{P}$  NMR spectra of compounds 9 and 23.**

expt s2pul

SAMPLE SPECIAL  
date Feb 13 2001 temp 25.0  
solvent CDCl3 gain not used  
file /export/home/~ hst not used  
vnmr1/vnmrsvs/data/~ pw50 11.500  
/81061\_13Feb2001/C~ pw50 20.000

ACQUISITION FLAGS  
sw 10063.6 11 n  
at 1.615 11 n  
nu 68460 11 y  
fb 10400 11 y  
bs 16 11 y  
d1 1.000 11 y  
nt 15000 11 y  
ct 627 11 y

PROCESSING  
sp -1174.2  
sfreq 75.463 f1 10063.6  
tof 726.4 f2 6876.7  
tpwr 63 f3 5602.4  
pw 2.556 11  
ER 11 PLOT -182.0

PARAMETERS  
d1 11  
dof 0  
dim 0  
dim 230  
dpr 38  
dpr 11500

NOISE  
no 0  
ph 0

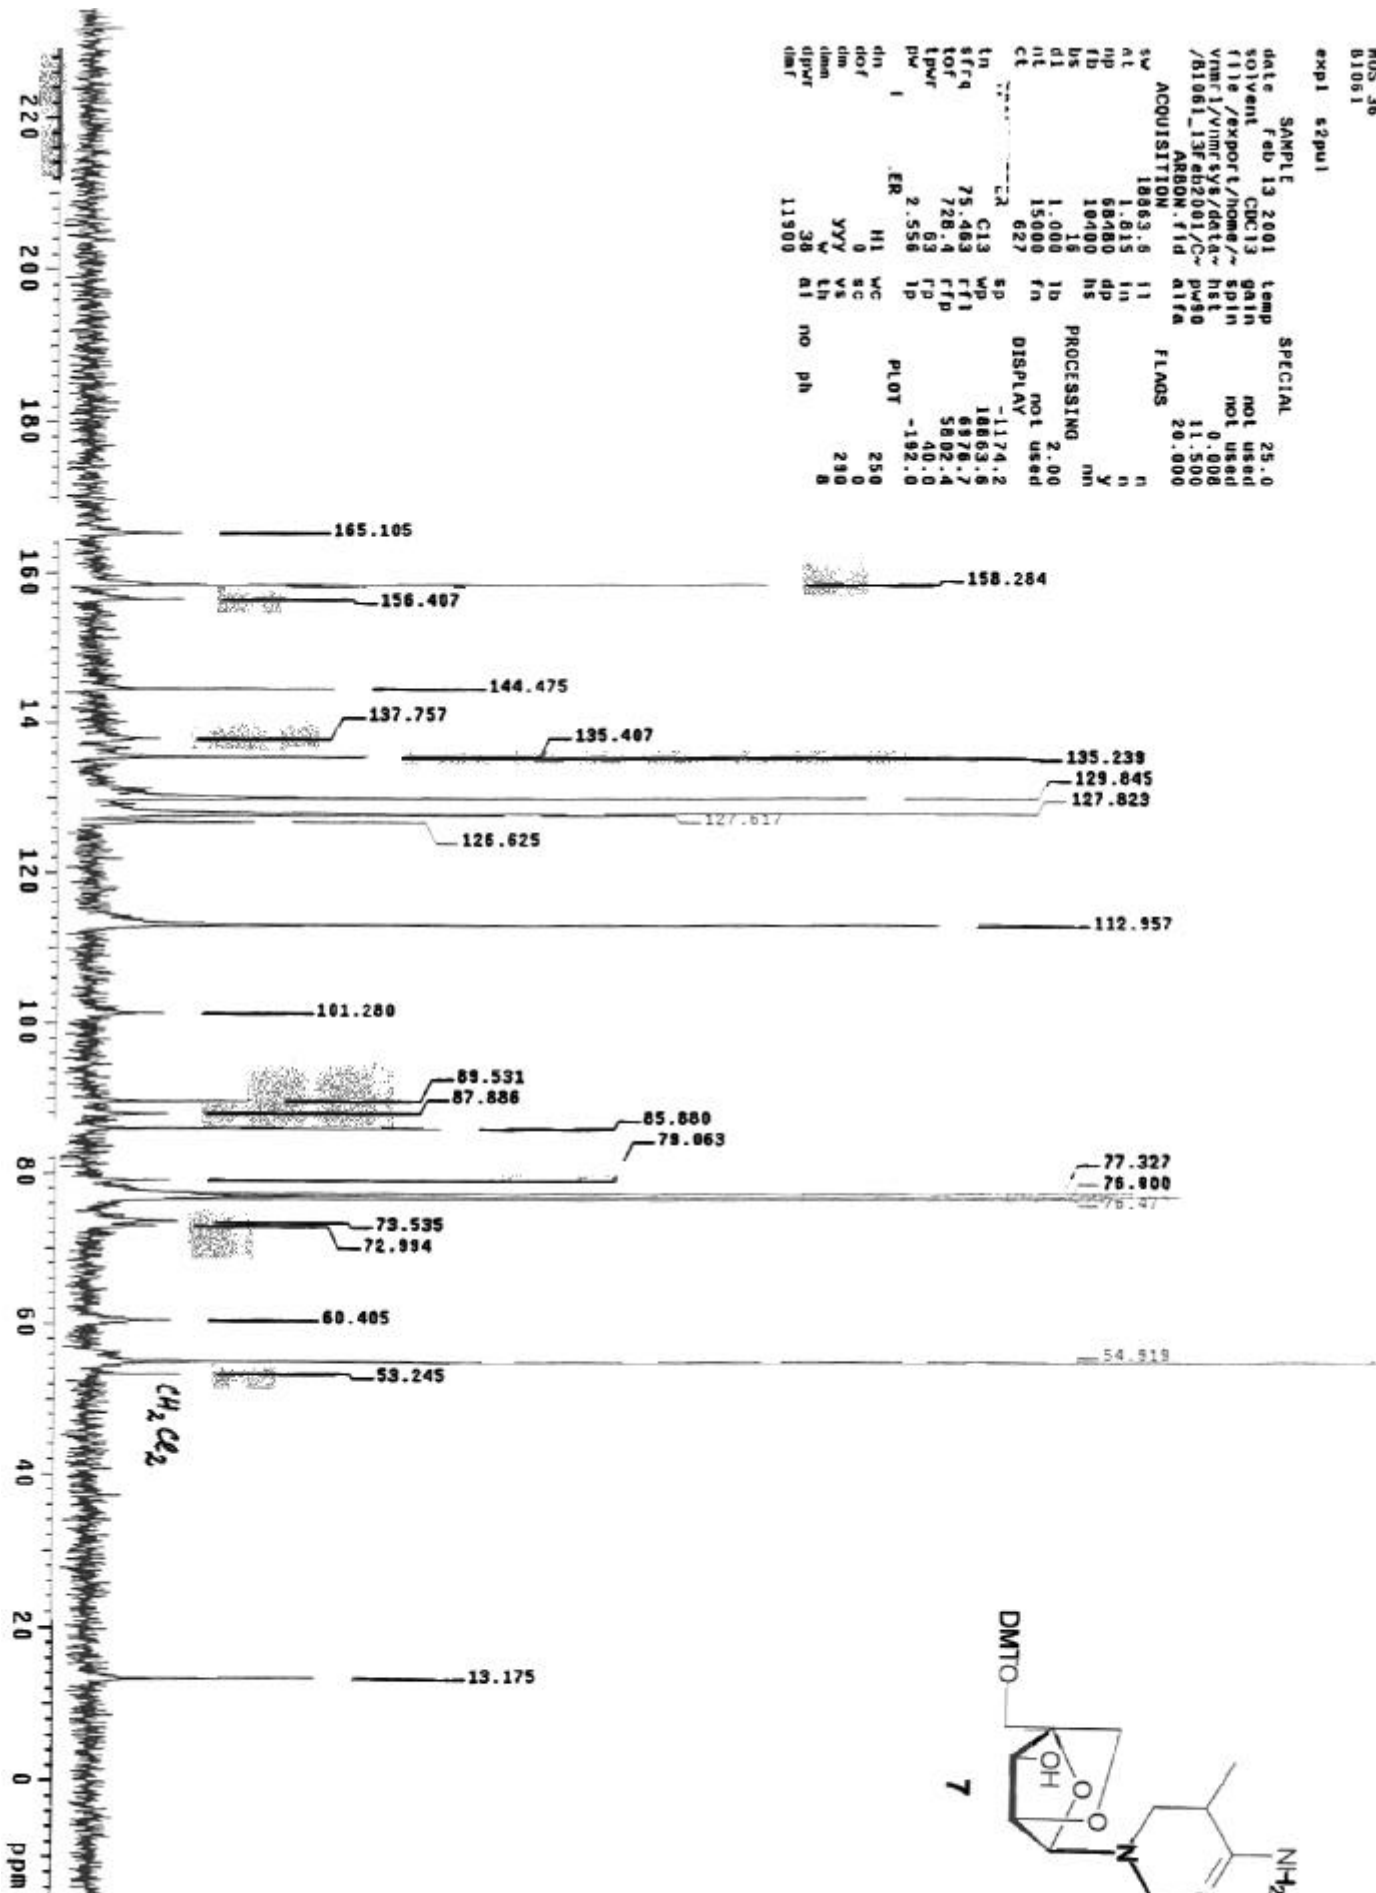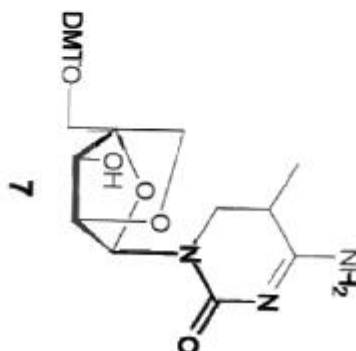



expt szput

SAMPLE  
date Feb 21 2001  
solvent CDCl3  
file exp  
ACQUISITION  
sw 18863.6  
at 1.815  
np 68480  
fb 10400  
bs 16  
dl 1.000  
ct 20000  
TRANSMITTER C13  
ln 75.463  
sfrq 728.4  
lprf 63  
pw 2.556  
DECOUPLER H1  
dn 0  
dot 0  
dnu yyy  
dnu w  
dnu sb  
dnu vs  
dnu th  
SPECIAL  
temp 25.0  
gain not used  
spin not used  
hst 0.006  
atfa 11.500  
flags 20.000  
PROCESSING  
1.00  
not used  
DISPLAY  
-1165.9  
18863.6  
6968.3  
5802.4  
50.9  
-203.7  
PLOT  
25.0  
0  
219  
4  
ai no ph

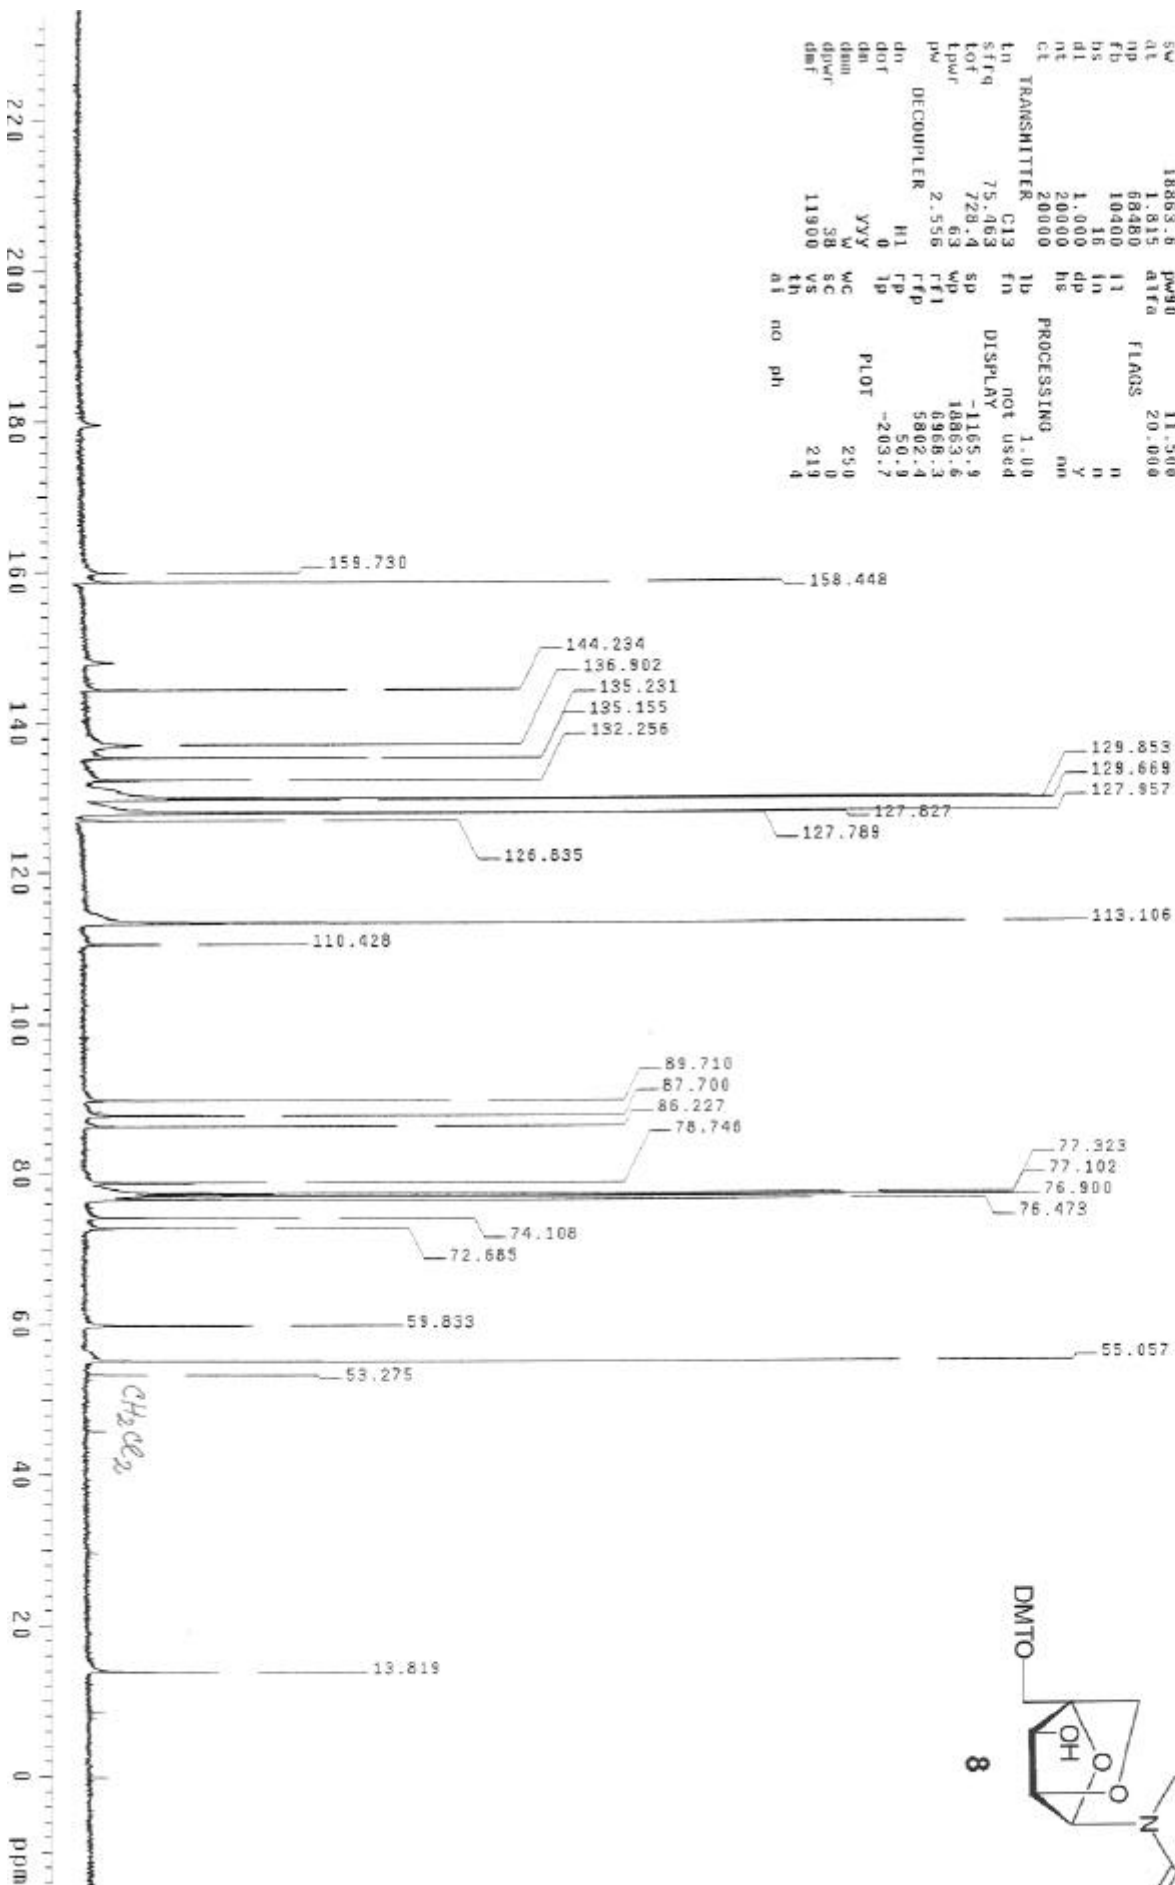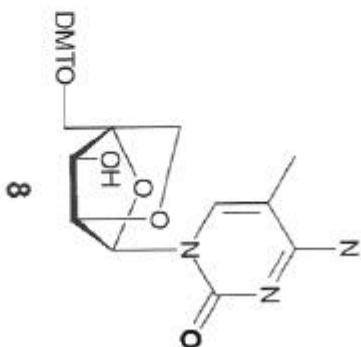

MOD37P II frak 6  
A8331

exp1 szpu1

| SAMPLE      |                 | SPECIAL    |          |
|-------------|-----------------|------------|----------|
| date        | 7 2000          | temp       | not used |
| solvent     | DMSO            | gain       | not used |
| file        | exp             | spin       | not used |
| ACQUISITION |                 | hst        | 0.008    |
| sw          | 26724.3         | pw90       | 14.000   |
| at          | 1.600           | atfa       | 20.000   |
| np          | 85504           | flags      |          |
| fb          | 14600           | 11         | n        |
| bs          | 16              | 1n         | n        |
| d1          | 0               | dp         | y        |
| nt          | 1024            | hs         | nn       |
| ct          | 485             | PROCESSING | 2.00     |
| tn          | TRANSMITTER P31 | fn         | not used |
| strq        | 121.485         | ep         | -2428.5  |
| tof         | 10594.9         | wp         | 26724.3  |
| tpwr        | 63              | fft1       | 2429.5   |
| pw          | 5.444           | fft        | 0        |
| DECOUPLER   |                 | h1         | fp       |
| dn          | 0               | 1p         | -23.9    |
| dn          | 0               | 1p         | -288.6   |
| dm          | yyy             | PLOT       |          |
| dm          | yy              | wc         | 250      |
| dm          | 36              | sc         | 0        |
| dpwr        | 11600           | vs         | 273      |
| dmf         |                 | th         | 11       |
| al          | no              | ph         |          |

150.370

150.528

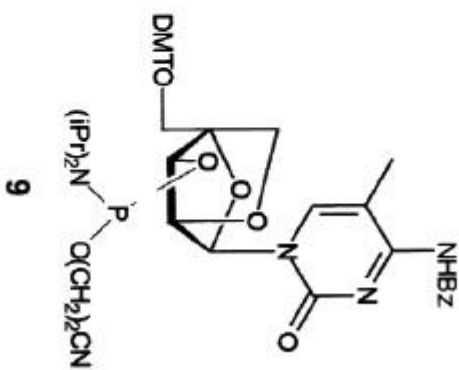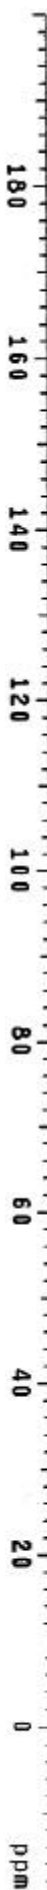

CH-30  
 419.73d  
 DATE: Mar 28 00  
 FILE: exp  
 SOLVENT: CDCl3  
 PRESERVE: C13  
 FREQUENCY: 100.573 MHz  
 SPECTRAL WIDTH: 25000.0 Hz  
 ACQUISITION TIME: 1.199 sec  
 RELAXATION DELAY: 1.000 sec  
 PULSE WIDTH: 10.0 usec  
 TEMPERATURE: 25.0 deg. C  
 NO. REPEATS: 103  
 DECOUPLE: H1  
 HIGH POWER: 37  
 DECOUPLER: CONTINUOUSLY ON  
 CHANNEL: PRECISION ACQUISITION  
 DATA PROCESSING  
 LINE BROADENING: 1.0 Hz  
 FT SIZE: 65536  
 DIAL ACQUISITION TIME: 3 minutes

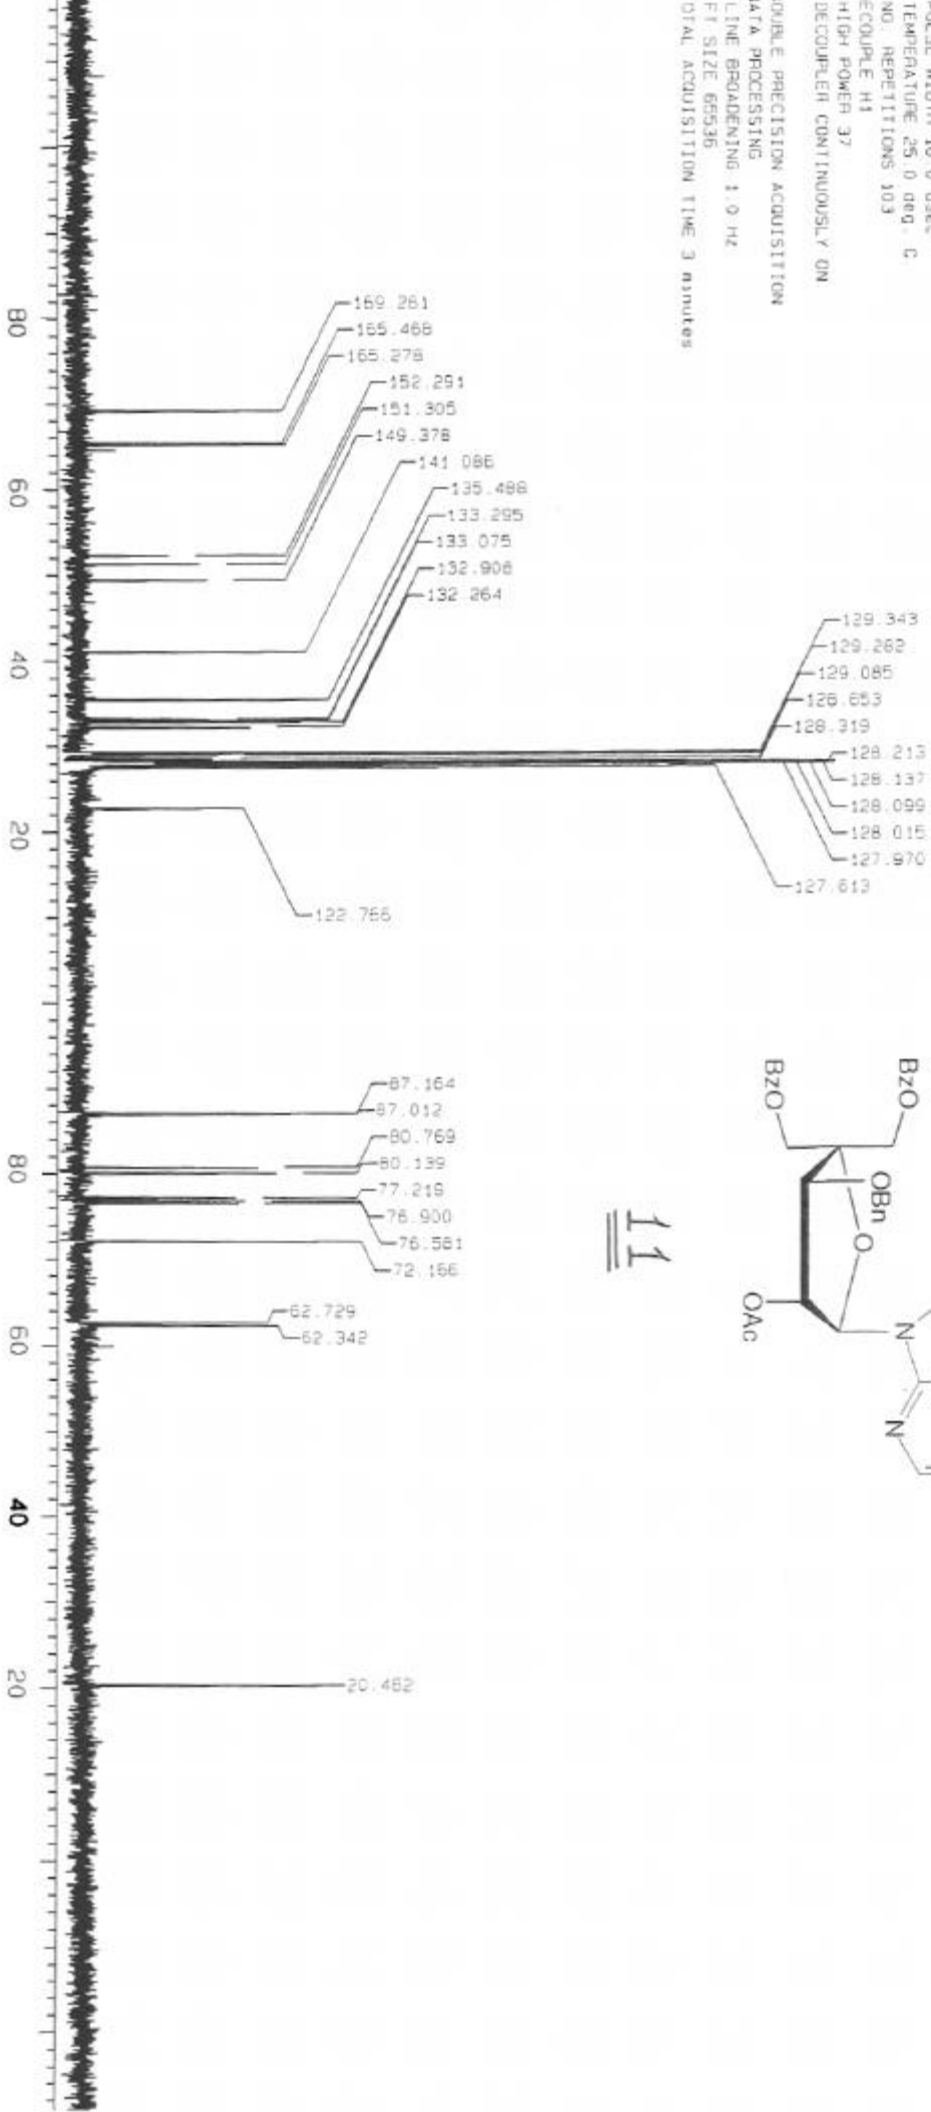

11

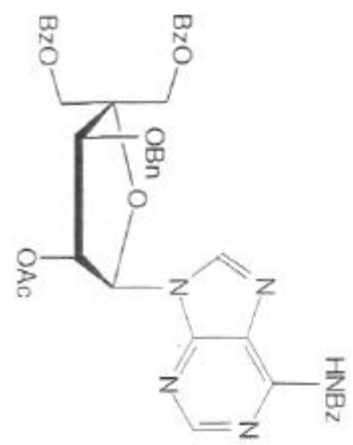

84  
244.13d  
ATE: Mar 10 00  
ILE: exp  
OLVENT: CDCl3  
RESERVE C13  
FREQUENCY 100.623 MHz  
SPECTRAL WIDTH 25000.0 Hz  
ACQUISITION TIME 1.199 sec  
RELAXATION DELAY 1.000 sec  
PULSE WIDTH 10.0 usec  
TEMPERATURE 25.0 deg. C.  
NO. REPETITIONS 568  
DECUPLE H1  
HIGH POWER 37  
DECOUPLER CONTINUOUSLY ON  
DOUBLE PRECISION ACQUISITION  
DATA PROCESSING  
LINE BROADCASTING 1.0 Hz  
FT SIZE 65536  
TOTAL ACQUISITION TIME 20 minutes

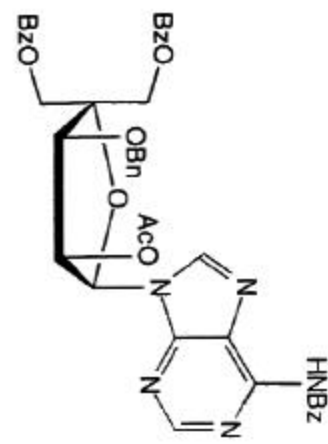

14

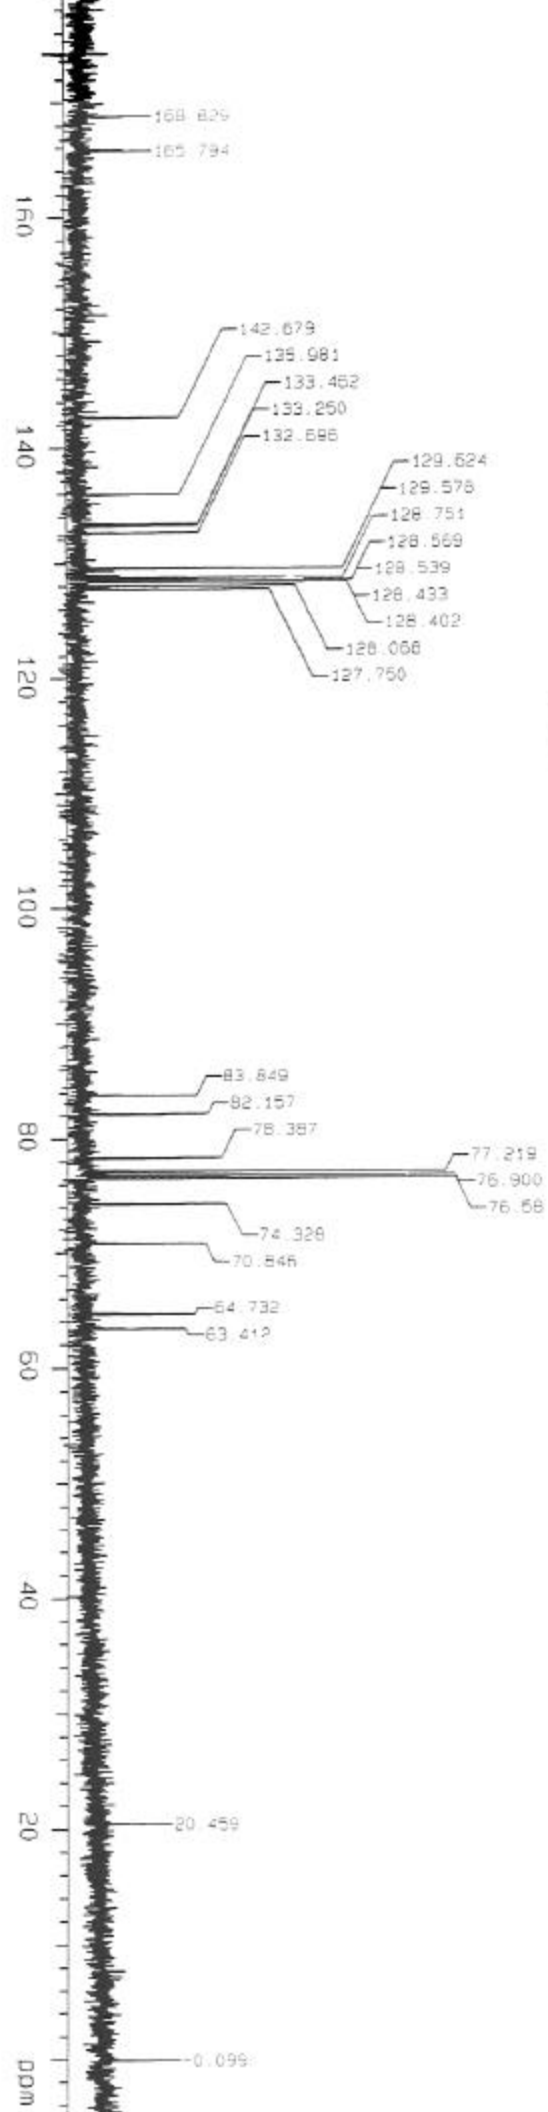

NAME: 50  
 DATE: APR 25 00  
 FILE: exp  
 SOLVENT: CDCl3  
 OBSERVE: C13  
 FREQUENCY: 100.573 MHz  
 SPECTRAL WIDTH: 25000.0 Hz  
 ACQUISITION TIME: 1.199 sec  
 RELAXATION DELAY: 1.000 sec  
 PULSE WIDTH: 10.0 usec  
 TEMPERATURE: 25.0 deg. C  
 NO. REPEATS: 1500  
 DECOUPLE: H1  
 HIGH POWER: 37  
 DECOUPLER: CONTINUOUSLY ON  
 DOUBLE PRECISION ACQUISITION  
 DATA PROCESSING  
 LINE BROADENING: 1.0 Hz  
 FT SIZE: 65536  
 TOTAL ACQUISITION TIME: 55 minutes

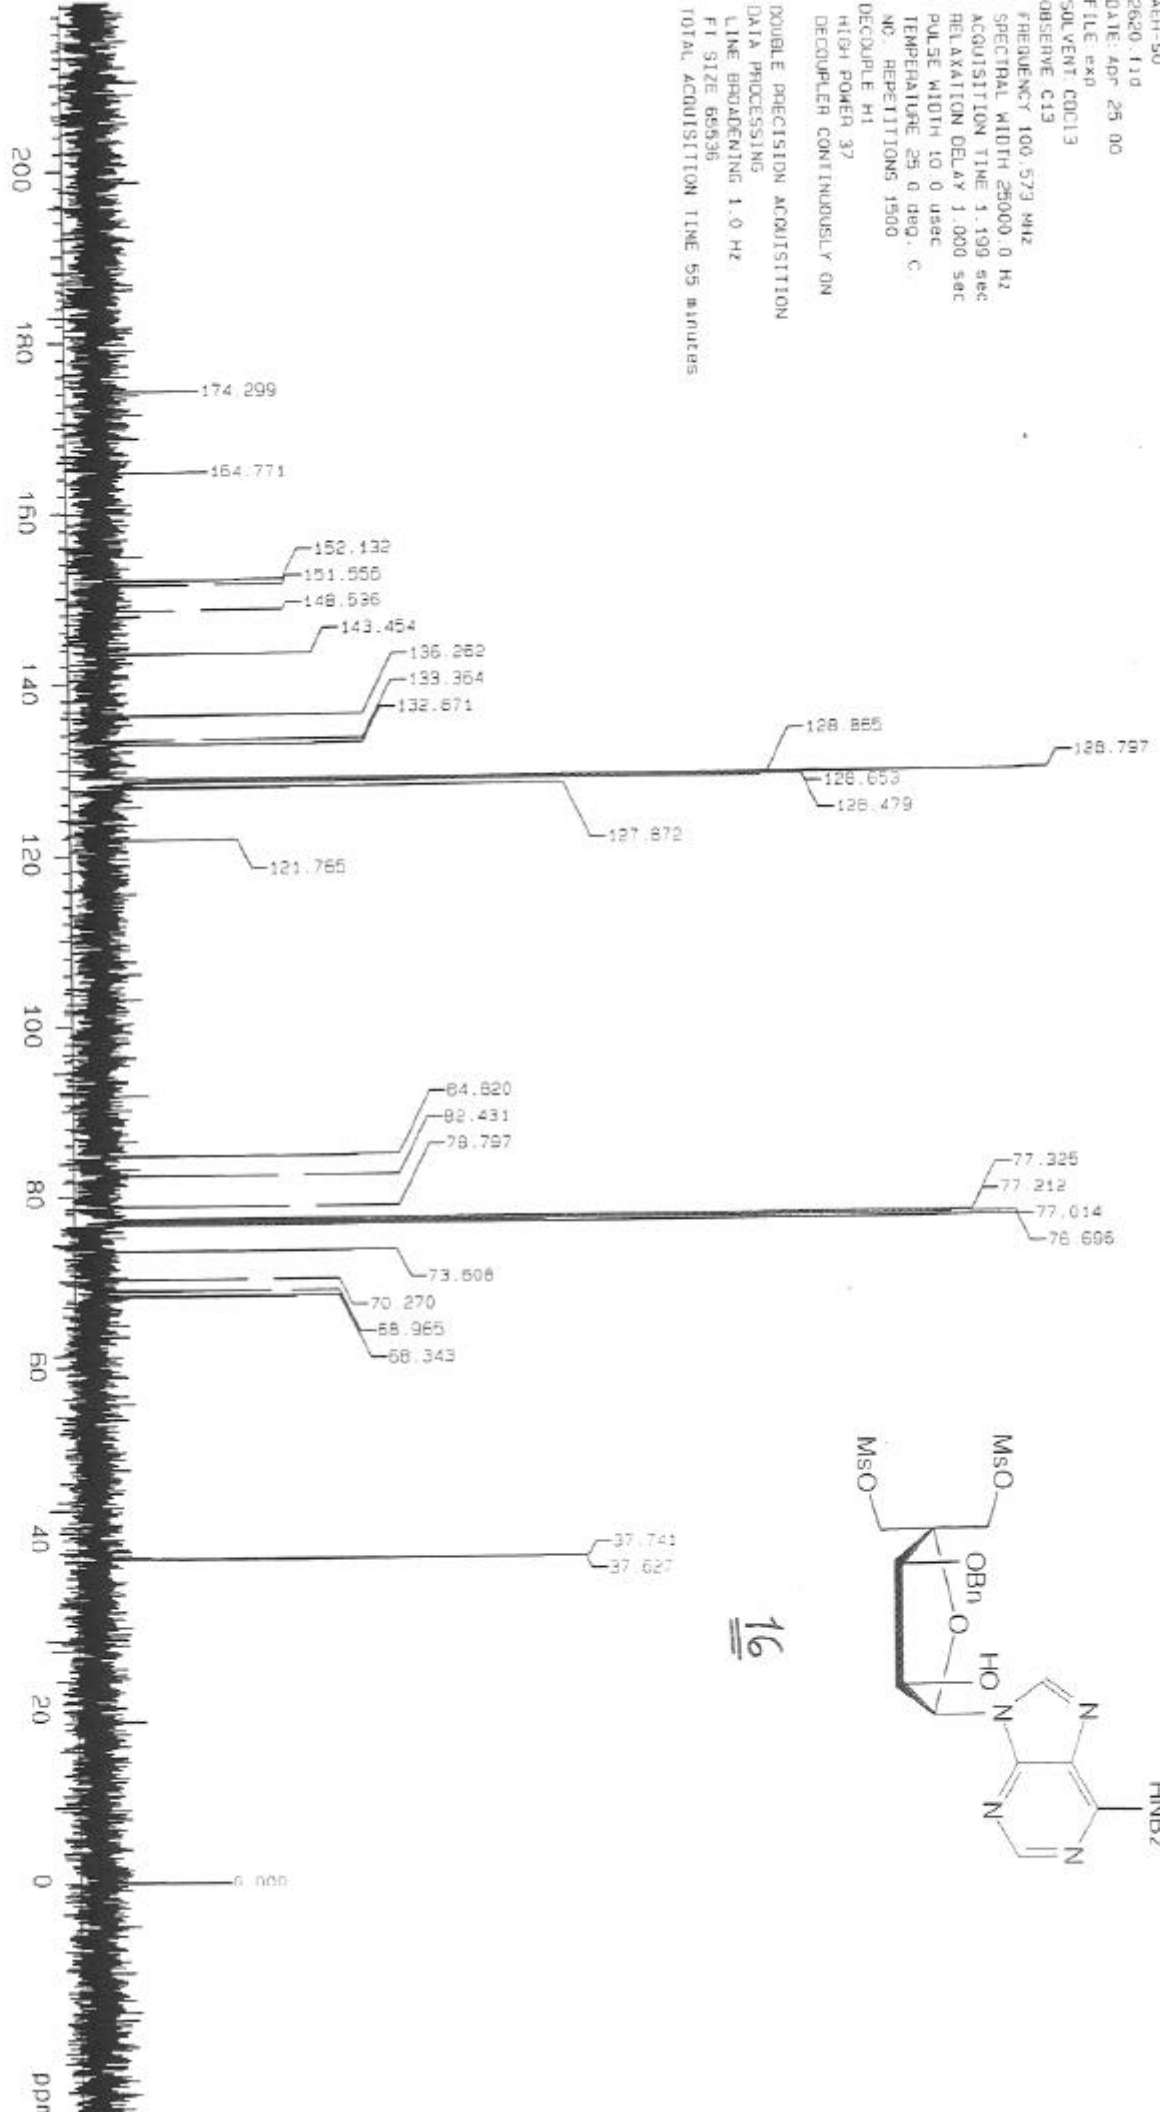

LEH-54  
 3064.f10  
 DATE: Jun 23 00  
 FILE: exp  
 SOLVENT: CDCl3  
 OBSERVE: C13  
 FREQUENCY: 100.573 MHz  
 SPECTRAL WIDTH: 25000.0 Hz  
 ACQUISITION TIME: 1.199 sec  
 RELAXATION DELAY: 1.000 sec  
 PULSE WIDTH: 10.0 usec  
 TEMPERATURE: 25.0 deg C  
 NO. REPETITIONS: 505  
 DECOUPLE: H1  
 HIGH POWER: 44  
 DECOUPLER: CONTINUOUSLY ON  
 DOUBLE PRECISION ACQUISITION  
 DATA PROCESSING  
 LINE BROADENING: 1.0 Hz  
 FT SIZE: 65536  
 TOTAL ACQUISITION TIME: 18 minutes

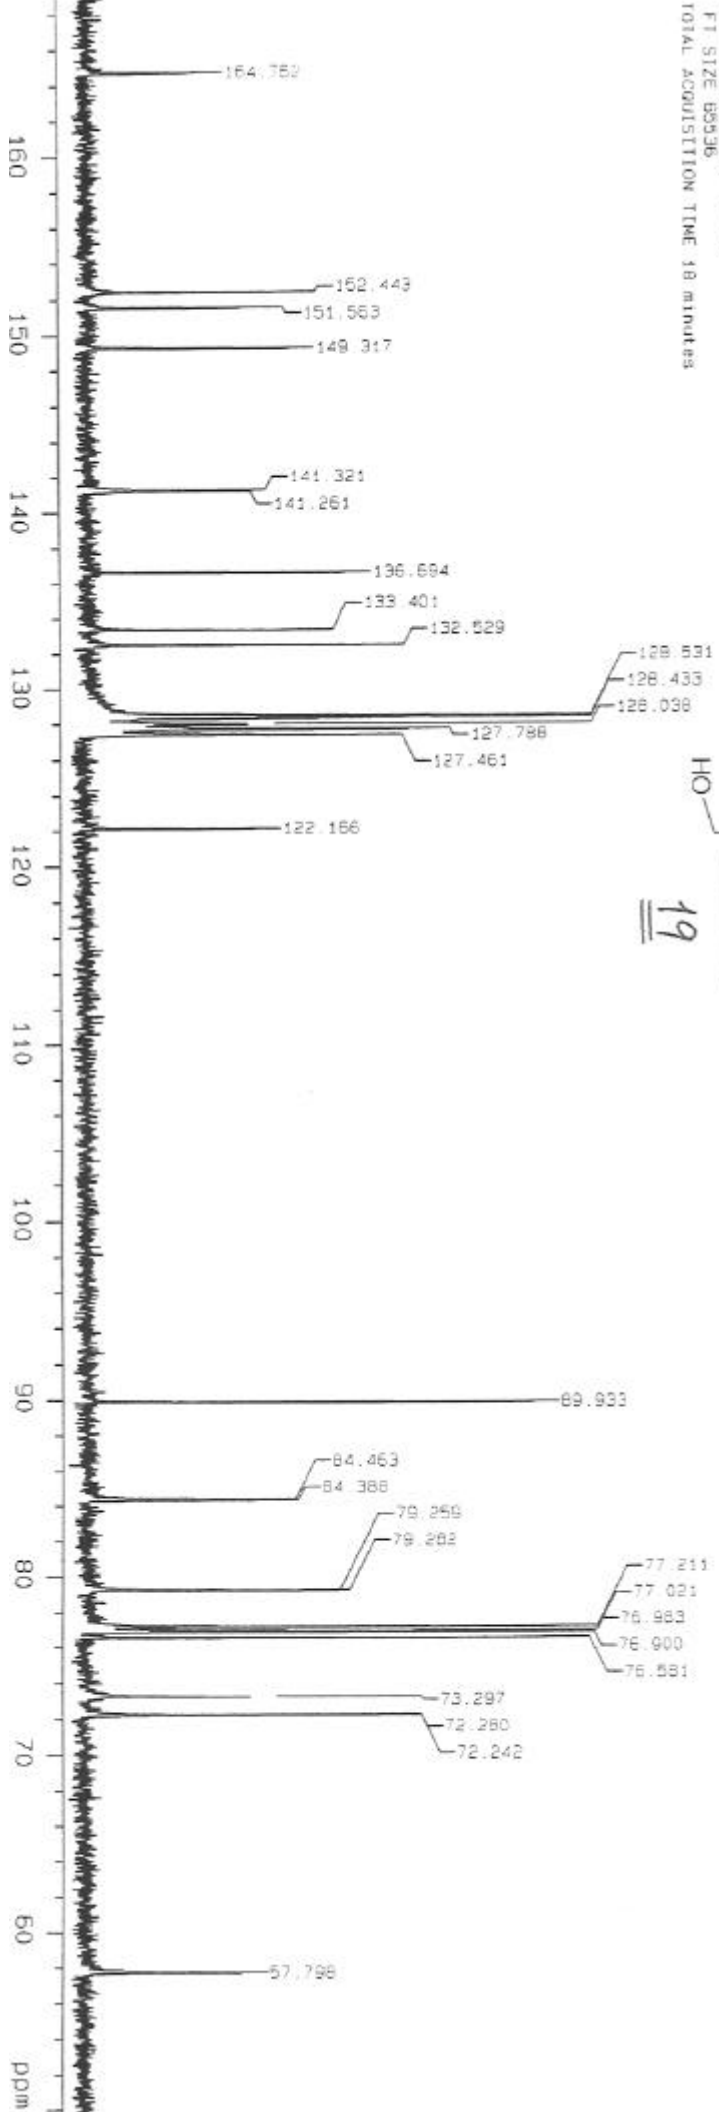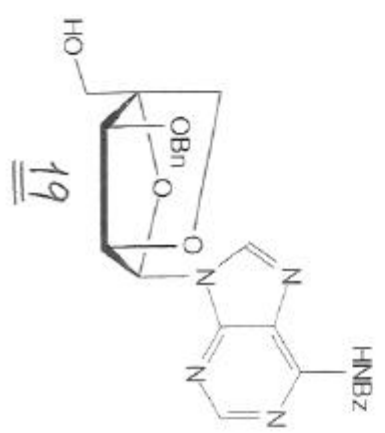

EH 55  
 009.f1d  
 DATE: Jun 15 00  
 FILE: exp  
 SOLVENT: DMSO  
 BSERVE C13  
 FREQUENCY 100.574 MHz  
 SPECTRAL WIDTH 25000.0 Hz  
 ACQUISITION TIME 1.199 sec  
 RELAXATION DELAY 1.000 sec  
 PULSE WIDTH 10.0 usec  
 TEMPERATURE 25.0 deg. C.  
 NO. REPEATITIONS 2000  
 DECOUPLE H1  
 HIGH POWER 37  
 DECOUPLER CONTINUOUSLY ON  
 DOUBLE PRECISION ACQUISITION  
 DATA PROCESSING  
 LINE BROADENING 1.0 Hz  
 FT SIZE 65536  
 TOTAL ACQUISITION TIME 73 minutes

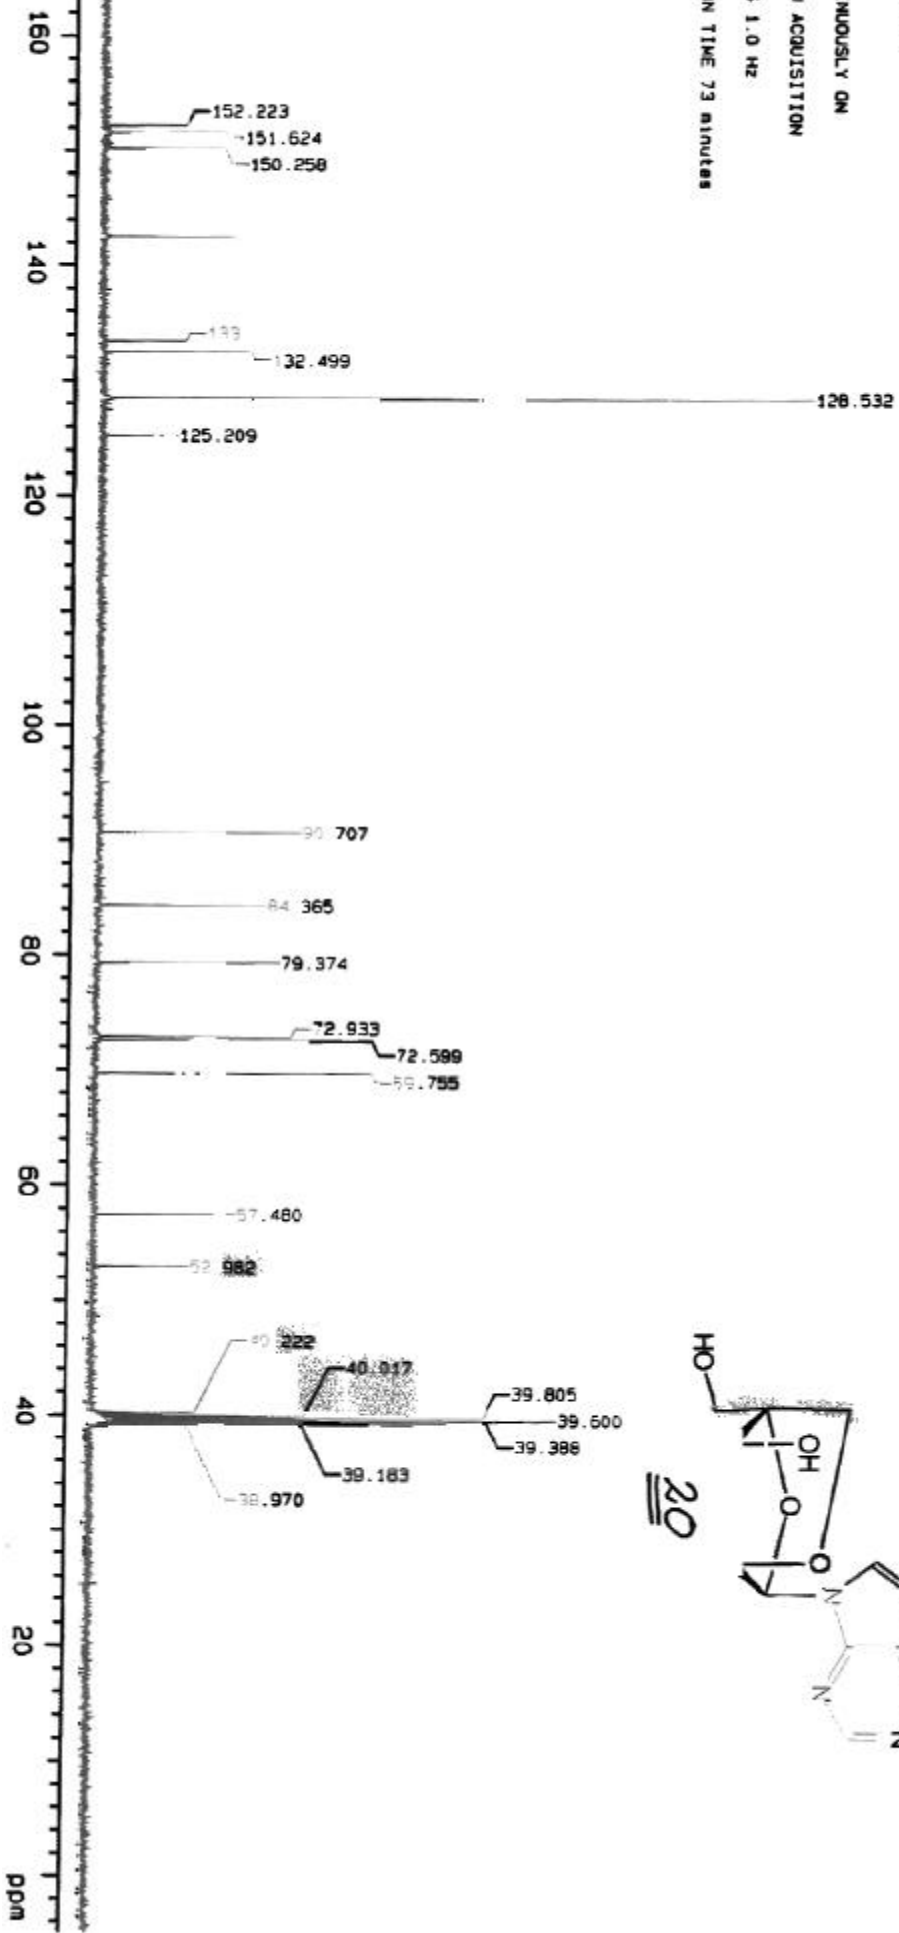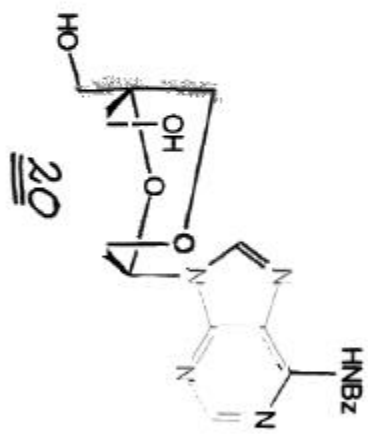

EH SB  
 017 fjd  
 DATE: Jun 16 00  
 FILE: exp  
 SOLVENT: DMSO  
 PRESERVE C13  
 FREQUENCY 100.574 MHz  
 SPECTRAL WIDTH 25000.0 Hz  
 ACQUISITION TIME 1.100 sec  
 RELAXATION DELAY 1.000 sec  
 PULSE WIDTH 10.0 usec  
 TEMPERATURE 25.0 deg. C  
 NO. REPEATITIONS 500  
 DECOUPLE H1  
 HIGH POWER 37  
 DECOUPLER CONTINUOUSLY ON  
 DOUBLE PRECISION ACQUISITION  
 DATA PROCESSING  
 LINE BROADENING 1.0 Hz  
 FT SIZE 65536  
 TOTAL ACQUISITION TIME 18 minutes

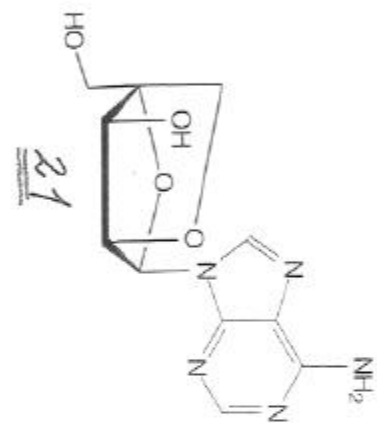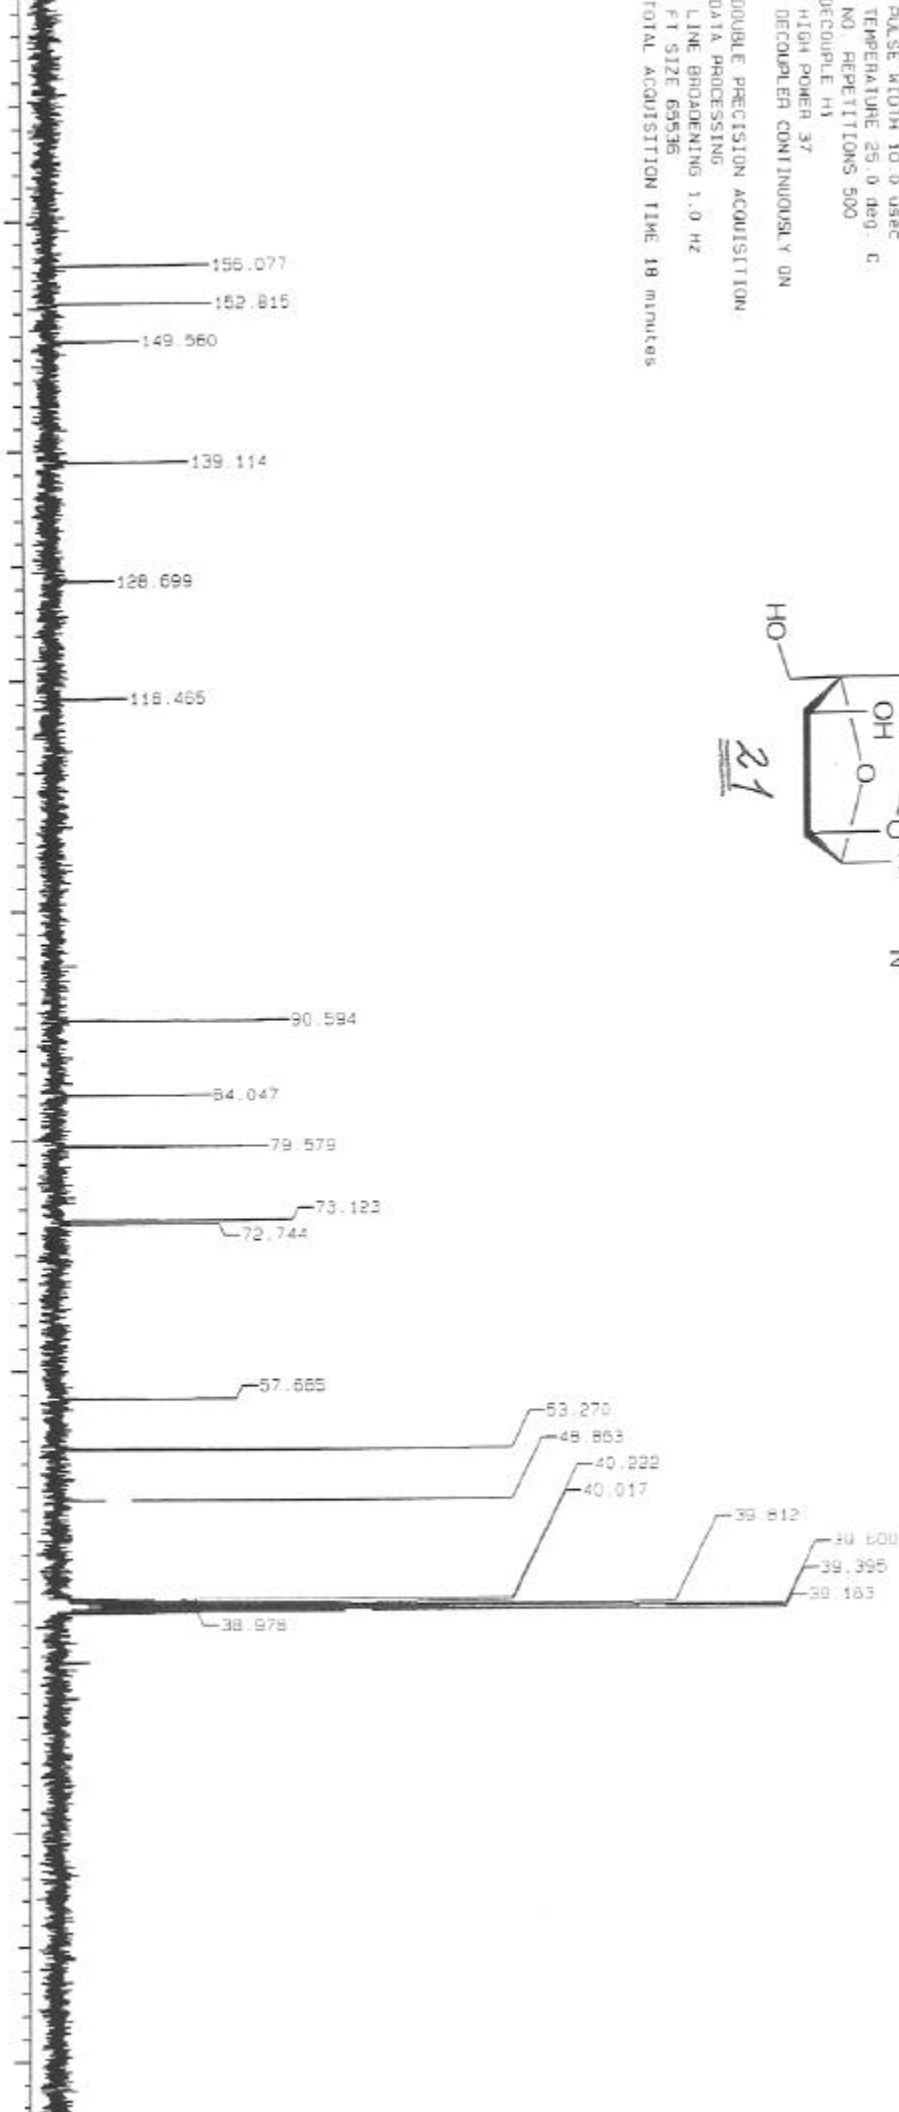



56  
EH-50  
993.710  
DATE: JUN 14 00  
FILE: exp  
SOLVENT: CDCl3  
RESERVE: C13  
FREQUENCY 100.573 MHz  
SPECTRAL WIDTH 25000.0 HZ  
ACQUISITION TIME 1.159 sec  
RELAXATION DELAY 1.000 sec  
PULSE WIDTH 10.0 usec  
TEMPERATURE 25.0 deg. C.  
NO. REPEATS 2000  
DECOUPLE: H1  
HIGH POWER 37  
DECOUPLER CONTINUOUSLY ON  
DOUBLE PRECISION ACQUISITION  
DATA PROCESSING  
F1 SIZE 65536  
LINE BROADENING 1.0 HZ  
TOTAL ACQUISITION TIME 73 minutes

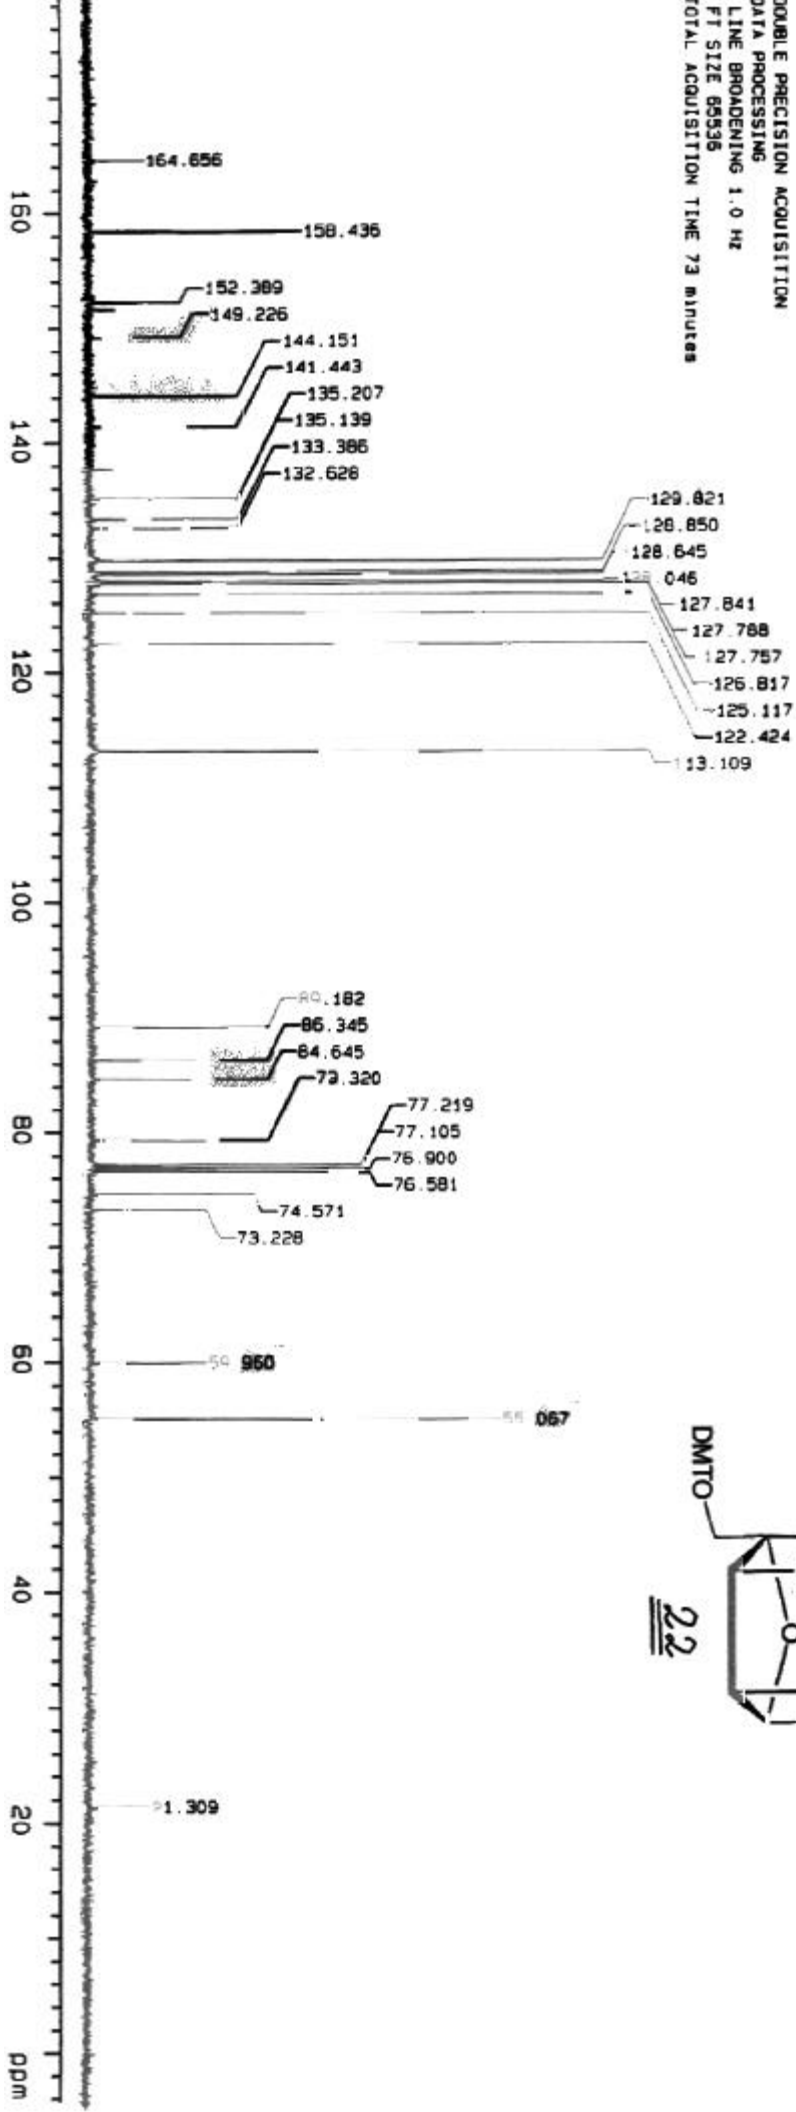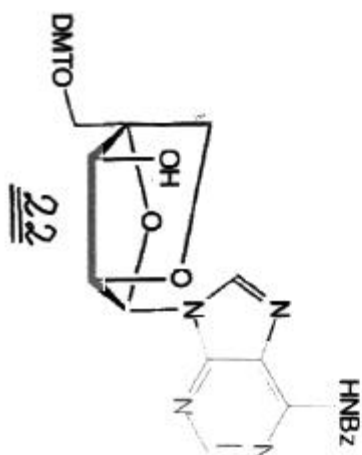

Interpolated Peak Listing

| PEAK | POINT | HEIGHT | REL. HT | H2       | PPM     |
|------|-------|--------|---------|----------|---------|
| 1    | 22385 | 35848K | 98.67   | 18247.35 | 150.195 |
| 2    | 22426 | 6486K  | 17.85   | 18222.45 | 149.990 |

S18

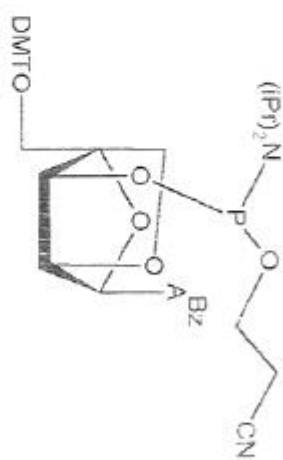

23

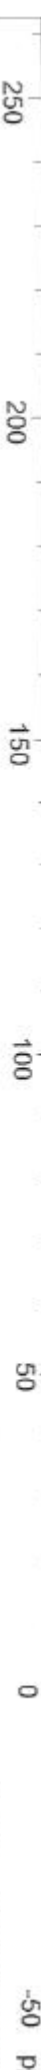

for H100d1C0U5C□□AC□□  
 F1: 121.491 F2: 300.092 SW1: 40000 PD: 1.0 sec OF1: 11910.0 LB: 5.0 PTS1d: 65536  
 EX: s2pul PW: 10.0 usec USER: DATE: Nov 23 2  
 WinNuts - \$TBR1123J

## Interpolated Peak Listing

| PEAK | POINT | HEIGHT | REL. INT | Hz       | F1M     |
|------|-------|--------|----------|----------|---------|
| 1    | 14435 | 3591K  | 10.76    | 12793.46 | 169.528 |
| 2    | 14446 | 3901K  | 11.30    | 12790.19 | 169.485 |
| 3    | 14580 | 3059K  | 8.74     | 12760.46 | 169.091 |
| 4    | 23104 | 4246K  | 12.14    | 10311.73 | 136.642 |
| 5    | 23129 | 3075K  | 8.79     | 10304.42 | 136.546 |
| 6    | 25208 | 17455K | 49.49    | 9709.33  | 128.660 |
| 7    | 25221 | 14648K | 41.87    | 9705.49  | 128.609 |
| 8    | 25267 | 10452K | 29.46    | 9692.53  | 128.437 |
| 9    | 25307 | 9013K  | 25.76    | 9680.99  | 128.284 |
| 10   | 25367 | 2734K  | 79.87    | 9665.72  | 128.035 |
| 11   | 32903 | 4863K  | 13.33    | 7506.24  | 92.466  |
| 12   | 34793 | 5194K  | 14.85    | 6985.17  | 92.297  |
| 13   | 36321 | 4874K  | 13.93    | 6527.74  | 86.500  |
| 14   | 37287 | 6294K  | 17.89    | 6251.20  | 82.836  |
| 15   | 37646 | 5492K  | 15.70    | 6140.39  | 81.473  |
| 16   | 37731 | 9379K  | 26.80    | 6124.03  | 81.150  |
| 17   | 38095 | 3636K  | 10.39    | 6019.54  | 79.766  |
| 18   | 38714 | 32712K | 93.50    | 5842.69  | 77.422  |
| 19   | 38926 | 33004K | 94.34    | 5810.81  | 77.000  |
| 20   | 38938 | 32009K | 91.49    | 5778.52  | 76.572  |
| 21   | 39006 | 6603K  | 18.87    | 5759.17  | 76.316  |
| 22   | 39697 | 6683K  | 19.10    | 5661.45  | 73.696  |
| 23   | 39946 | 5265K  | 15.11    | 5490.12  | 72.750  |
| 24   | 40984 | 7214K  | 20.62    | 5192.98  | 68.813  |
| 25   | 41041 | 4842K  | 13.84    | 5176.55  | 68.595  |
| 26   | 41231 | 7609K  | 21.75    | 5122.30  | 67.876  |
| 27   | 41534 | 4545K  | 12.99    | 5035.45  | 66.725  |
| 28   | 49124 | 7281K  | 20.81    | 2862.55  | 37.932  |
| 29   | 49171 | 8723K  | 24.93    | 2849.13  | 37.754  |
| 30   | 49188 | 7462K  | 21.33    | 2844.26  | 37.690  |
| 31   | 49234 | 6263K  | 17.90    | 2831.01  | 37.514  |
| 32   | 53578 | 5094K  | 14.56    | 1587.41  | 21.035  |
| 33   | 53603 | 5175K  | 14.79    | 1580.22  | 20.940  |
| 34   | 53658 | 4117K  | 11.77    | 1564.41  | 20.730  |
| 35   | 53750 | 4649K  | 13.29    | 1538.25  | 20.384  |
| 36   | 58860 | 5021K  | 14.35    | 75.13    | 0.996   |

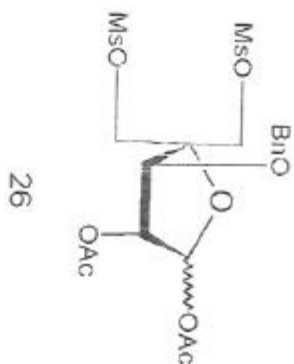

200 150 100 50 0 ppm

888.gw7  
 F1: 75.465 F2: 300.091 SW1: 18762 PW: 8.8 usec PD: 1.2 sec OF1: 7545.0 LB: 1.0 PTSID: 65536  
 USER: DATE: Sep 15 2000  
 WinNMR - 888.gw7.fid

S 20

| Interpolated Peak | Peak  | POINT  | HEIGHT | REL. INT | H2      | PM |
|-------------------|-------|--------|--------|----------|---------|----|
| 1                 | 14439 | 10977K | 19.96  | 12789.50 | 169.476 |    |
| 2                 | 15739 | 6558K  | 11.93  | 12417.40 | 164.545 |    |
| 3                 | 18811 | 16442K | 29.90  | 11537.86 | 152.890 |    |
| 4                 | 19154 | 4771K  | 8.68   | 11439.77 | 151.590 |    |
| 5                 | 19664 | 7352K  | 13.37  | 11293.73 | 149.655 |    |
| 6                 | 21888 | 15553K | 28.28  | 10656.87 | 141.216 |    |
| 7                 | 23354 | 11553K | 21.01  | 10237.41 | 135.658 |    |
| 8                 | 23940 | 5945K  | 10.81  | 10069.39 | 133.431 |    |
| 9                 | 24103 | 16082K | 29.25  | 10022.75 | 132.813 |    |
| 10                | 25153 | 42747K | 77.74  | 9722.28  | 128.831 |    |
| 11                | 25172 | 55563K | 101.04 | 9716.82  | 128.759 |    |
| 12                | 25196 | 29668K | 53.95  | 9710.03  | 128.669 |    |
| 13                | 25211 | 6663K  | 12.12  | 9705.70  | 128.612 |    |
| 14                | 25247 | 53183K | 96.71  | 9695.27  | 128.474 |    |
| 15                | 25270 | 3244K  | 5.90   | 9688.67  | 128.386 |    |
| 16                | 25370 | 3271K  | 5.95   | 9660.02  | 128.007 |    |
| 17                | 25422 | 37564K | 68.31  | 9645.22  | 127.810 |    |
| 18                | 26701 | 3665K  | 6.66   | 9278.98  | 122.957 |    |
| 19                | 36103 | 14564K | 26.49  | 6587.53  | 87.292  |    |
| 20                | 36450 | 16359K | 29.75  | 6487.94  | 85.973  |    |
| 21                | 37696 | 19121K | 34.77  | 6131.27  | 81.246  |    |
| 22                | 38184 | 18106K | 32.93  | 5991.77  | 79.398  |    |
| 23                | 38703 | 19978K | 36.33  | 5842.96  | 77.426  |    |
| 24                | 38761 | 7763K  | 14.12  | 5826.47  | 77.207  |    |
| 25                | 38814 | 21256K | 38.65  | 5811.26  | 77.006  |    |
| 26                | 38926 | 20389K | 37.08  | 5779.36  | 76.583  |    |
| 27                | 39792 | 17062K | 31.03  | 5531.37  | 73.297  |    |
| 28                | 41358 | 12497K | 22.73  | 5082.98  | 67.355  |    |
| 29                | 41852 | 15340K | 27.90  | 4941.43  | 65.480  |    |
| 30                | 49184 | 27432K | 49.88  | 2842.51  | 37.667  |    |
| 31                | 49202 | 25747K | 46.82  | 2837.39  | 37.599  |    |
| 32                | 53667 | 15764K | 28.67  | 1559.04  | 20.659  |    |

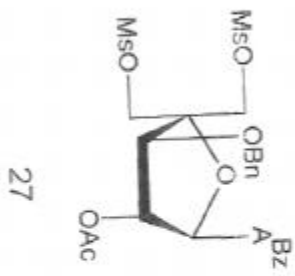

200 150 100 50 0 ppm

lbr a10  
F1: 75.465  
EX: sgpu1  
F2: 300.091  
SW1: 18762  
PW: 8.8 usec  
PD: 1.2 sec  
OF1: 7542.2  
NA: 1024  
LB: 1.0  
PTSLd: 65536  
USER: DATE: Dec 22 2000  
WinNus - \$lbr1222.a10

Interpolated Peak Listing

| PEAK | POINT | HEIGHT | REL. HT | Hz       | PPM     |
|------|-------|--------|---------|----------|---------|
| 1    | 15611 | 10394K | 13.22   | 12455.07 | 145.044 |
| 2    | 16938 | 13280K | 16.89   | 11502.63 | 152.423 |
| 3    | 19272 | 8660K  | 11.01   | 11407.01 | 151.156 |
| 4    | 19977 | 11558K | 14.70   | 11204.99 | 148.479 |
| 5    | 21694 | 12957K | 16.48   | 10713.48 | 141.966 |
| 6    | 23028 | 13960K | 17.75   | 10331.58 | 136.905 |
| 7    | 23989 | 10038K | 12.77   | 10056.39 | 133.259 |
| 8    | 24048 | 15909K | 20.23   | 10039.47 | 133.035 |
| 9    | 25125 | 42218K | 53.69   | 9731.18  | 128.949 |
| 10   | 25211 | 62125K | 79.01   | 9706.67  | 128.625 |
| 11   | 25251 | 4129K  | 5.25    | 9695.16  | 128.472 |
| 12   | 25294 | 76972K | 97.89   | 9682.77  | 128.308 |
| 13   | 25438 | 38355K | 48.78   | 9641.81  | 127.765 |
| 14   | 27037 | 7646K  | 9.72    | 9183.84  | 111.697 |
| 15   | 36074 | 16017K | 20.37   | 6596.61  | 77.413  |
| 16   | 37287 | 23378K | 29.73   | 6249.40  | 72.812  |
| 17   | 37548 | 19112K | 24.31   | 6174.63  | 71.821  |
| 18   | 38398 | 15828K | 20.13   | 5931.54  | 78.600  |
| 19   | 38707 | 25160K | 32.00   | 5843.03  | 77.427  |
| 20   | 38765 | 11336K | 14.42   | 5826.23  | 77.204  |
| 21   | 38819 | 26473K | 33.67   | 5810.81  | 77.000  |
| 22   | 38930 | 25940K | 32.99   | 5779.02  | 76.579  |
| 23   | 39813 | 20079K | 25.54   | 5526.35  | 73.231  |
| 24   | 41060 | 12675K | 16.12   | 5169.36  | 68.500  |
| 25   | 41107 | 14716K | 18.72   | 5155.77  | 68.320  |
| 26   | 49191 | 33423K | 42.51   | 2841.52  | 37.653  |
| 27   | 49257 | 30003K | 38.16   | 2822.53  | 37.402  |

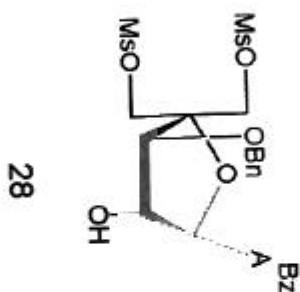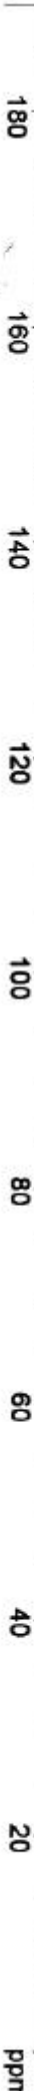

br 112  
 F1: 75.465 F2: 300.091 SW1: 18762  
 EX: s2pul PW: 8.8 usec PD: 1.2 sec NA: 1024 LB: 1.0  
 USER: DATE: Dec 22 2000  
 PTSID: 65536

522

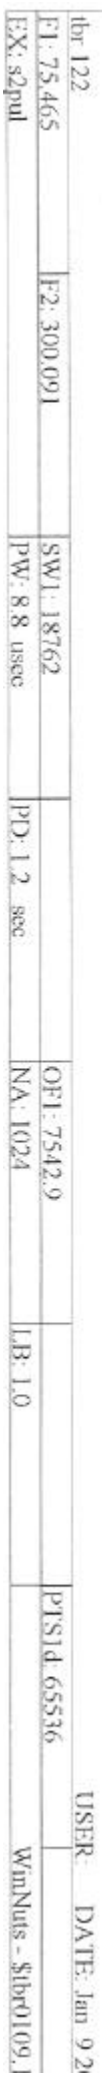

Interpolated Peak Listing

| PEAK | POINT | HEIGHT   | REL. HT | H2       | PM      |
|------|-------|----------|---------|----------|---------|
| 1    | 7577  | 3873K    | 6.14    | 14756.53 | 195.541 |
| 2    | 14471 | 13525K   | 21.45   | 12782.86 | 169.388 |
| 3    | 17913 | 6797K    | 10.78   | 11797.49 | 156.330 |
| 4    | 18430 | 8181K    | 12.98   | 11649.41 | 154.368 |
| 5    | 18985 | 7929K    | 12.58   | 11490.55 | 152.263 |
| 6    | 19532 | 4056K    | 6.43    | 11334.14 | 150.190 |
| 7    | 21705 | 14497K   | 22.99   | 10711.95 | 141.946 |
| 8    | 23336 | 13005K   | 20.63   | 10244.97 | 135.758 |
| 9    | 24984 | 7353K    | 11.66   | 9773.07  | 129.544 |
| 10   | 24993 | 4567K    | 7.24    | 9770.47  | 129.470 |
| 11   | 25064 | 27884K   | 44.22   | 9750.25  | 129.282 |
| 12   | 25180 | 55075K   | 87.35   | 9717.06  | 128.752 |
| 13   | 25212 | 26444K   | 41.94   | 9707.89  | 128.611 |
| 14   | 25263 | 54263K   | 86.06   | 9693.26  | 128.417 |
| 15   | 25278 | 7797K    | 12.37   | 9688.90  | 128.359 |
| 16   | 25531 | 4575K    | 7.26    | 9616.57  | 127.451 |
| 17   | 25595 | 4700K    | 7.45    | 9598.18  | 127.157 |
| 18   | 25639 | 4429K    | 7.02    | 9585.74  | 127.082 |
| 19   | 27258 | 4162K    | 6.60    | 9122.14  | 120.879 |
| 20   | 32768 | -4117100 | -6.53   | 7544.66  | 99.995  |
| 21   | 36027 | 12614K   | 20.01   | 6611.67  | 87.612  |
| 22   | 36448 | 12511K   | 19.84   | 6491.18  | 86.016  |
| 23   | 37709 | 18854K   | 29.90   | 6130.26  | 81.283  |
| 24   | 38250 | 13495K   | 21.40   | 5975.44  | 79.182  |
| 25   | 38713 | 55729K   | 88.39   | 5842.66  | 77.422  |
| 26   | 38825 | 59355K   | 94.14   | 5810.81  | 77.000  |
| 27   | 38937 | 58681K   | 93.07   | 5778.56  | 76.573  |
| 28   | 39788 | 16152K   | 25.62   | 5534.95  | 73.344  |
| 29   | 41370 | 10748K   | 17.05   | 5082.00  | 67.342  |
| 30   | 41857 | 14969K   | 23.74   | 4942.62  | 65.485  |
| 31   | 49181 | 22063K   | 34.99   | 2845.85  | 37.711  |
| 32   | 49197 | 27481K   | 43.59   | 2841.46  | 37.603  |
| 33   | 49222 | 3812K    | 6.05    | 2834.09  | 37.555  |
| 34   | 52509 | 15012K   | 23.81   | 1893.25  | 25.098  |
| 35   | 53683 | 16001K   | 25.38   | 1557.20  | 20.685  |
| 36   | 58860 | 8083K    | 12.82   | 74.84    | 0.992   |

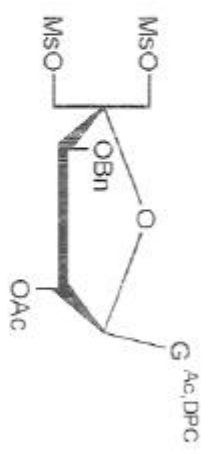

30

S23

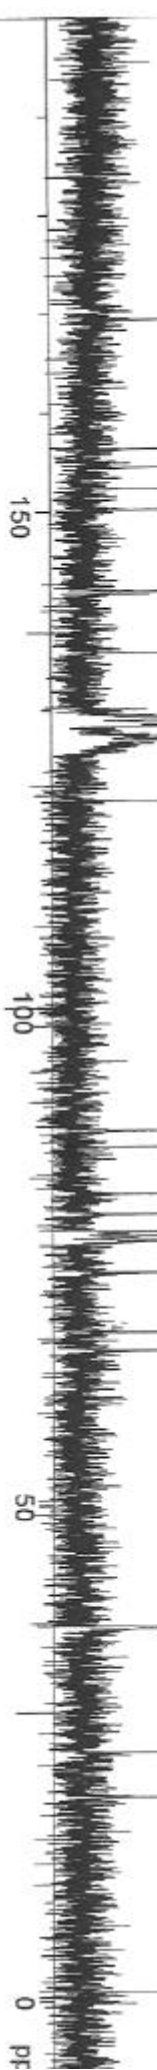

gga 136  
 F1: 75.465 F2: 300.091 SW1: 18762 PD: 1.2 sec OF1: 7544.7 LB: 1.0 PTS1d: 65536  
 EX: s2pul PW: 8.8 usec  
 USER: DATE: Sep 25 2007  
 WmNuts - \$GGA0925.1

Interpolated Peak Listing

| PEAK | POINT | HEIGHT   | REL. HT | HZ       | PPM     |
|------|-------|----------|---------|----------|---------|
| 1    | 14583 | 1865K    | 4.58    | 12756.12 | 169.060 |
| 2    | 18015 | 7375K    | 18.12   | 11776.21 | 156.048 |
| 3    | 18543 | 4983K    | 12.24   | 11625.24 | 154.048 |
| 4    | 19272 | 6387K    | 15.69   | 11416.42 | 151.281 |
| 5    | 19438 | 4302K    | 10.57   | 11368.90 | 150.651 |
| 6    | 21597 | 6168K    | 15.16   | 10750.77 | 142.460 |
| 7    | 21797 | 2765K    | 6.80    | 10693.41 | 141.700 |
| 8    | 22988 | 9465K    | 23.26   | 10352.61 | 137.184 |
| 9    | 24823 | 1905K    | 4.68    | 9827.12  | 130.221 |
| 10   | 24908 | 1809K    | 4.45    | 9802.93  | 129.900 |
| 11   | 24948 | 1945K    | 4.78    | 9791.37  | 129.747 |
| 12   | 25049 | 16240K   | 39.91   | 9762.39  | 129.363 |
| 13   | 25184 | 3125K    | 7.68    | 9723.83  | 128.852 |
| 14   | 25229 | 40428K   | 99.35   | 9710.95  | 128.681 |
| 15   | 25272 | 3204K    | 7.87    | 9698.67  | 128.519 |
| 16   | 25332 | 17941K   | 44.09   | 9681.59  | 128.292 |
| 17   | 25353 | 39163K   | 96.24   | 9675.62  | 128.213 |
| 18   | 25548 | 2471K    | 6.07    | 9619.77  | 127.473 |
| 19   | 25590 | 2431K    | 5.97    | 9607.79  | 127.314 |
| 20   | 25618 | 2431K    | 5.97    | 9599.54  | 127.205 |
| 21   | 25660 | 1841K    | 4.53    | 9587.73  | 127.049 |
| 22   | 26136 | -1009222 | -4.45   | 9451.47  | 125.243 |
| 23   | 27213 | 4838K    | 11.89   | 9142.89  | 121.154 |
| 24   | 35613 | 6661K    | 16.37   | 6738.11  | 89.288  |
| 25   | 37195 | 9980K    | 24.52   | 6285.28  | 83.207  |
| 26   | 37358 | 8862K    | 21.78   | 6238.71  | 82.670  |
| 27   | 38134 | 4327K    | 10.63   | 6016.35  | 79.724  |
| 28   | 38703 | 11984K   | 29.45   | 5853.46  | 77.565  |
| 29   | 38761 | 10394K   | 25.54   | 5836.95  | 77.346  |
| 30   | 38814 | 12880K   | 31.65   | 5821.78  | 77.145  |
| 31   | 38926 | 12734K   | 31.29   | 5789.87  | 76.722  |
| 32   | 39819 | 9910K    | 24.35   | 5534.13  | 73.334  |
| 33   | 41153 | 11862K   | 29.15   | 5152.16  | 68.272  |
| 34   | 48218 | 21395K   | 52.58   | 2843.23  | 37.676  |
| 35   | 49276 | 18970K   | 46.62   | 2826.66  | 37.457  |
| 36   | 49301 | 2163K    | 5.32    | 2819.49  | 37.361  |
| 37   | 49368 | 1815K    | 4.46    | 2800.40  | 37.108  |
| 38   | 52564 | 12035K   | 29.58   | 1885.43  | 24.984  |

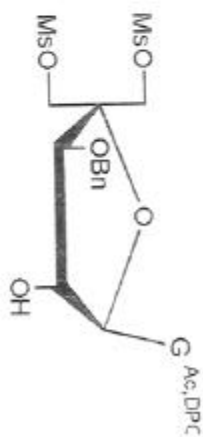

31

S24

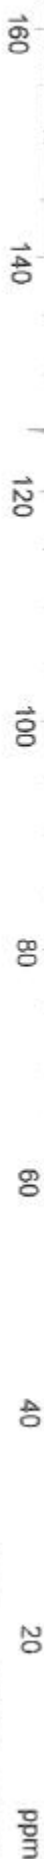

88a 017  
 F1: 75.465 F2: 300.091 SW1: 18762 PD: 1.2 sec NA: 256 LB: 1.0 PTSId: 65536 USER: DATE: Jan 24 2001  
 EX: s2pul PW: 8.8 usec WinNuts - \$88a0124.017



INTERPOLATED PEAK LISTING

| PEAK | POINT | HEIGHT  | REL. HT | HZ       | PPM     |
|------|-------|---------|---------|----------|---------|
| 1    | 14651 | 1468K   | 19.61   | 12729.36 | 168.679 |
| 2    | 17974 | 741147  | 9.90    | 11777.89 | 156.071 |
| 3    | 18337 | 1039K   | 13.88   | 11673.95 | 154.693 |
| 4    | 18972 | 1625K   | 21.70   | 11492.18 | 152.285 |
| 5    | 19524 | 1034K   | 13.82   | 11334.16 | 150.191 |
| 6    | 21361 | 2114K   | 28.23   | 10808.35 | 143.223 |
| 7    | 21787 | 698890  | 9.33    | 10686.35 | 141.607 |
| 8    | 23274 | 1485K   | 19.83   | 10260.57 | 135.964 |
| 9    | 25063 | 5083K   | 67.80   | 9748.56  | 129.180 |
| 10   | 25167 | 6930K   | 92.56   | 9718.63  | 128.783 |
| 11   | 25186 | 4832K   | 64.53   | 9713.20  | 128.711 |
| 12   | 25270 | 6935K   | 92.63   | 9689.35  | 128.395 |
| 13   | 25561 | 801122  | 10.70   | 9605.86  | 127.289 |
| 14   | 25593 | 1057K   | 14.12   | 9596.68  | 127.167 |
| 15   | 25643 | 1025K   | 13.68   | 9582.50  | 126.979 |
| 16   | 25661 | 756524  | 10.10   | 9577.37  | 126.911 |
| 17   | 25745 | 614756  | 8.21    | 9553.35  | 126.593 |
| 18   | 25800 | 628269  | 8.39    | 9537.40  | 126.382 |
| 19   | 27434 | 636687  | 8.50    | 9069.73  | 120.184 |
| 20   | 37379 | 2100K   | 28.04   | 6222.52  | 82.456  |
| 21   | 37458 | 1872K   | 25.00   | 6200.13  | 82.159  |
| 22   | 38453 | 1955K   | 26.12   | 5915.21  | 78.383  |
| 23   | 38707 | 4701K   | 62.79   | 5842.36  | 77.418  |
| 24   | 38818 | 4665K   | 62.30   | 5810.73  | 76.999  |
| 25   | 38930 | 4707K   | 62.87   | 5778.47  | 76.571  |
| 26   | 39425 | 2368K   | 31.63   | 5636.98  | 74.697  |
| 27   | 40107 | -624486 | -8.34   | 5441.72  | 72.109  |
| 28   | 40522 | 2443K   | 32.63   | 5322.76  | 70.533  |
| 29   | 41174 | 1518K   | 20.28   | 5136.06  | 68.059  |
| 30   | 41265 | 1494K   | 19.95   | 5110.11  | 67.715  |
| 31   | 44345 | -618581 | -8.26   | 4228.29  | 56.030  |
| 32   | 49112 | 3133K   | 41.84   | 2863.53  | 37.945  |
| 33   | 49174 | 3120K   | 41.67   | 2845.81  | 37.710  |
| 34   | 52493 | 2147K   | 28.67   | 1895.61  | 25.119  |
| 35   | 53718 | 2568K   | 34.30   | 1544.99  | 20.473  |

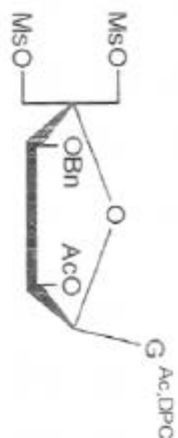

32

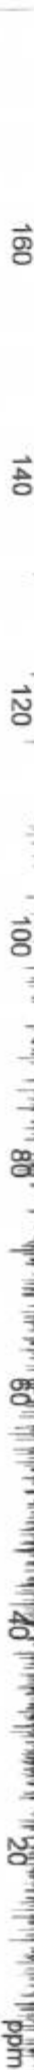

gga 003

F1: 75.465 F2: 300.091 SW1: 18762 PD: 1.2 sec OF1: 7542.7 LB: 1.0 PTSId: 65536 USER: DATE: Nov 6 2000  
 EX: s2pul PW: 8.8 usec NA: 256 WinNuts - Segal1106.003

Interpolated Peak Listing

| PEAK | POINT | HEIGHT  | REL. HT | HZ       | PPM     |
|------|-------|---------|---------|----------|---------|
| 1    | 13042 | 5048K   | 2.37    | 13156.89 | 174.343 |
| 2    | 18010 | 5108K   | 2.39    | 11734.67 | 155.497 |
| 3    | 19104 | 5390K   | 2.53    | 11421.69 | 151.350 |
| 4    | 22655 | 7713K   | 3.61    | 10404.80 | 137.876 |
| 5    | 23595 | 6370K   | 2.98    | 10135.81 | 134.311 |
| 6    | 25183 | 34638K  | 16.23   | 9681.16  | 128.286 |
| 7    | 25367 | 15115K  | 7.08    | 9628.56  | 127.589 |
| 8    | 25407 | 32186K  | 15.08   | 9617.05  | 127.436 |
| 9    | 35429 | 13155K  | 6.16    | 6747.89  | 89.417  |
| 10   | 37141 | 10737K  | 5.03    | 6257.76  | 82.922  |
| 11   | 38022 | 9688K   | 4.54    | 6005.48  | 79.579  |
| 12   | 38737 | 10287K  | 4.82    | 5800.94  | 76.869  |
| 13   | 39763 | 7606K   | 3.56    | 5507.11  | 72.975  |
| 14   | 40276 | 12052K  | 5.65    | 5360.33  | 71.030  |
| 15   | 40707 | 53416K  | 25.03   | 5236.84  | 69.394  |
| 16   | 43935 | 7358K   | 3.45    | 4312.75  | 57.149  |
| 17   | 48367 | 28909K  | 13.55   | 3043.96  | 40.336  |
| 18   | 48441 | 88136K  | 41.30   | 3022.85  | 40.056  |
| 19   | 48514 | 180502K | 84.58   | 3001.91  | 39.779  |
| 20   | 48587 | 211169K | 98.95   | 2980.89  | 39.500  |
| 21   | 48661 | 179952K | 84.33   | 2959.78  | 39.220  |
| 22   | 48734 | 90723K  | 42.51   | 2939.03  | 38.945  |
| 23   | 48807 | 30582K  | 14.33   | 2917.93  | 38.666  |
| 24   | 52292 | 13400K  | 6.28    | 1920.23  | 25.445  |
| 25   | 58978 | 22286K  | 10.44   | 6.18     | 0.082   |

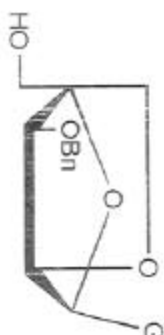

34

S 26

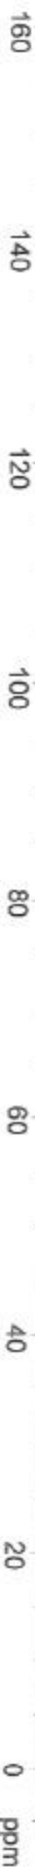

Interpolated Peak Listing

| PK# | POINT | HEIGHT   | REL. HT | H2       | PPM     |
|-----|-------|----------|---------|----------|---------|
| 1   | 6756  | 1143K    | 5.34    | 14967.36 | 198.334 |
| 2   | 11668 | 2770K    | 12.96   | 13561.01 | 179.698 |
| 3   | 18027 | 1561K    | 7.30    | 11740.47 | 155.574 |
| 4   | 19916 | 1722K    | 8.05    | 11199.73 | 148.409 |
| 5   | 19938 | 1097K    | 5.13    | 11193.39 | 148.325 |
| 6   | 20088 | 1552K    | 7.26    | 11150.48 | 147.756 |
| 7   | 20584 | -1127520 | -5.27   | 11008.67 | 145.877 |
| 8   | 22780 | 7921K    | 37.05   | 10379.76 | 137.543 |
| 9   | 22991 | 3120K    | 14.59   | 10319.34 | 136.743 |
| 10  | 25273 | 20120K   | 94.10   | 9666.17  | 128.087 |
| 11  | 25383 | 11992K   | 56.09   | 9634.55  | 127.668 |
| 12  | 25505 | 20832K   | 97.43   | 9599.72  | 127.207 |
| 13  | 27545 | 1242K    | 5.81    | 9015.63  | 119.467 |
| 14  | 27605 | -1170728 | -5.48   | 8998.51  | 119.240 |
| 15  | 32133 | -1116913 | -5.22   | 7702.21  | 102.063 |
| 16  | 35377 | 6285K    | 29.40   | 6773.49  | 89.756  |
| 17  | 36762 | 9514K    | 44.50   | 6376.93  | 84.501  |
| 18  | 38213 | 11699K   | 54.71   | 5961.64  | 78.998  |
| 19  | 38627 | 6146K    | 28.75   | 5843.22  | 77.429  |
| 20  | 38688 | 2446K    | 11.44   | 5825.59  | 77.196  |
| 21  | 38740 | 6558K    | 30.67   | 5810.84  | 77.000  |
| 22  | 38793 | 10695K   | 50.02   | 5795.48  | 76.796  |
| 23  | 38853 | 6199K    | 28.99   | 5778.39  | 76.570  |
| 24  | 39813 | 7801K    | 36.49   | 5503.54  | 72.928  |
| 25  | 40098 | 9703K    | 45.38   | 5421.94  | 71.847  |
| 26  | 40657 | 8536K    | 39.92   | 5262.10  | 69.729  |
| 27  | 44002 | 7110K    | 33.25   | 4304.40  | 57.038  |
| 28  | 46109 | 1608K    | 7.52    | 3701.25  | 49.046  |
| 29  | 46185 | 4782K    | 22.36   | 3679.47  | 48.757  |
| 30  | 46217 | 1139K    | 5.33    | 3670.25  | 48.635  |
| 31  | 46260 | 9493K    | 44.40   | 3657.82  | 48.470  |
| 32  | 46335 | 10808K   | 50.55   | 3636.35  | 48.186  |
| 33  | 46410 | 9809K    | 45.88   | 3614.82  | 47.900  |
| 34  | 46485 | 4621K    | 21.61   | 3593.47  | 47.618  |
| 35  | 46559 | 1250K    | 5.85    | 3572.21  | 47.336  |
| 36  | 49687 | 10905K   | 51.00   | 2676.67  | 35.469  |
| 37  | 51343 | 1767K    | 8.27    | 2202.78  | 29.189  |
| 38  | 54215 | 14673K   | 68.63   | 1380.44  | 18.292  |
| 39  | 54231 | 15268K   | 71.41   | 1376.00  | 18.233  |

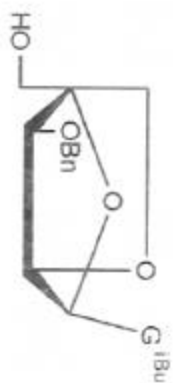

35

S27

150

100

50

ppm

|       |          |
|-------|----------|
| SL    | 250.134  |
| SY    | 03.0     |
| OT    | 3500.000 |
| ST    | 65536    |
| TD    | 32768    |
| SH    | 6000.000 |
| H2/PT | .153     |

|        |          |
|--------|----------|
| PA     | 9.0      |
| RD     | 0.0      |
| AG     | 3.277    |
| RC     | 10       |
| MS     | 6400     |
| TE     | 300      |
| FW     | 6300     |
| 02     | 5669.678 |
| DP     | 401.00   |
| LB     | 1.100    |
| GB     | 0.0      |
| CX     | 40.00    |
| CY     | 0        |
| F1     | 12.001   |
| F2     | 499      |
| HZ/CM  | 78.163   |
| PPM/CM | 312      |
| SR     | 2036.18  |

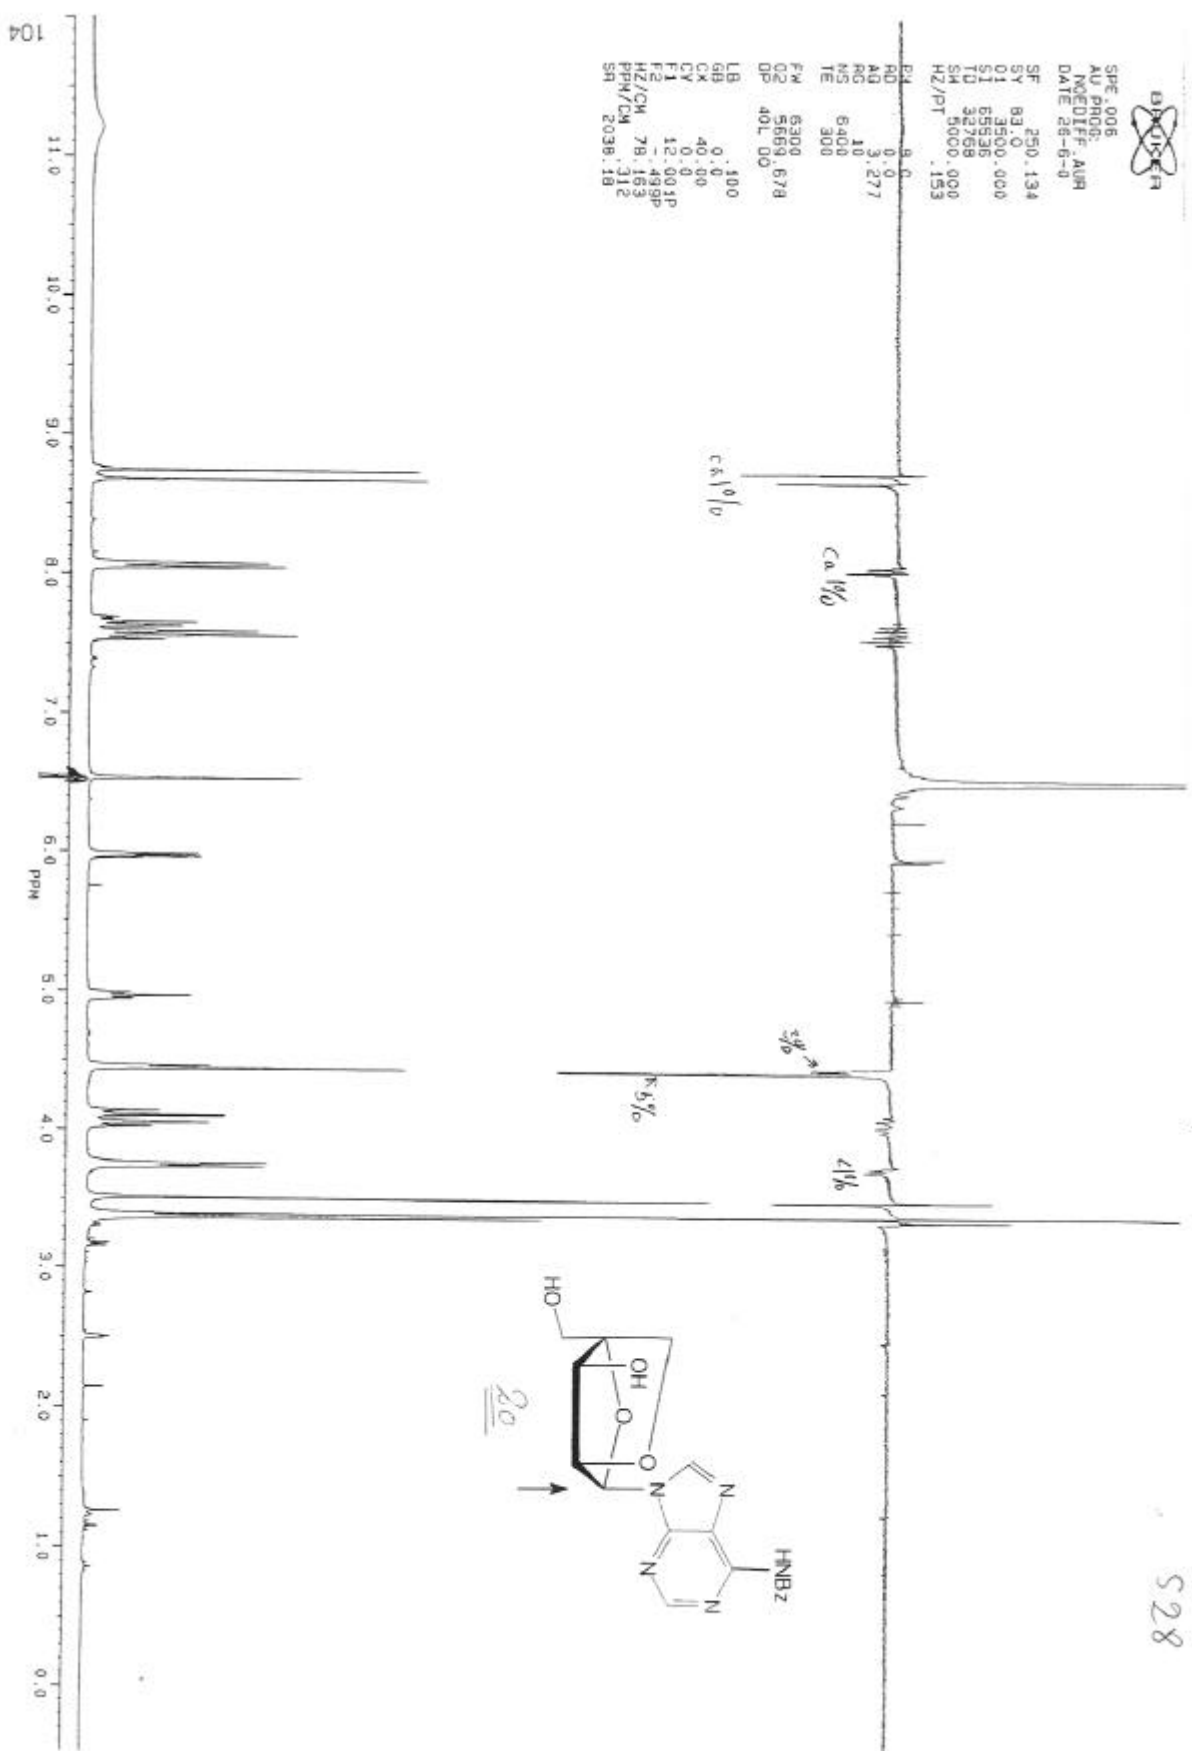

```

SPE, 003
AU PROG:
MODIFIED, AUM
DATE 26-6-0

```

|    |       |      |
|----|-------|------|
| 54 | 250   | 134  |
| 55 | 83.0  |      |
| 56 | 3500  | .000 |
| 57 | 65536 |      |
| 58 | 32768 |      |
| 59 | 8000  | .000 |
| 60 |       | .153 |

|        |          |
|--------|----------|
| PI     | 0.0      |
| RI     | 0.0      |
| AD     | 3.277    |
| RS     | 10       |
| NS     | 6400     |
| TE     | 300      |
| FA     | 6300     |
| 02     | 5149.983 |
| DP     | 40L 00   |
| LB     | 100      |
| 6R     | 0.0      |
| CX     | 40.00    |
| CY     | 0.0      |
| F1     | 12.001   |
| F2     | 1.499    |
| HZ/CM  | 78.163   |
| PPM/CM | 312      |
| SR     | 2038.18  |

529

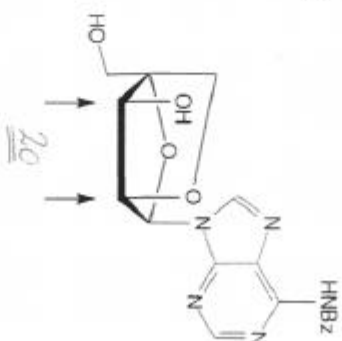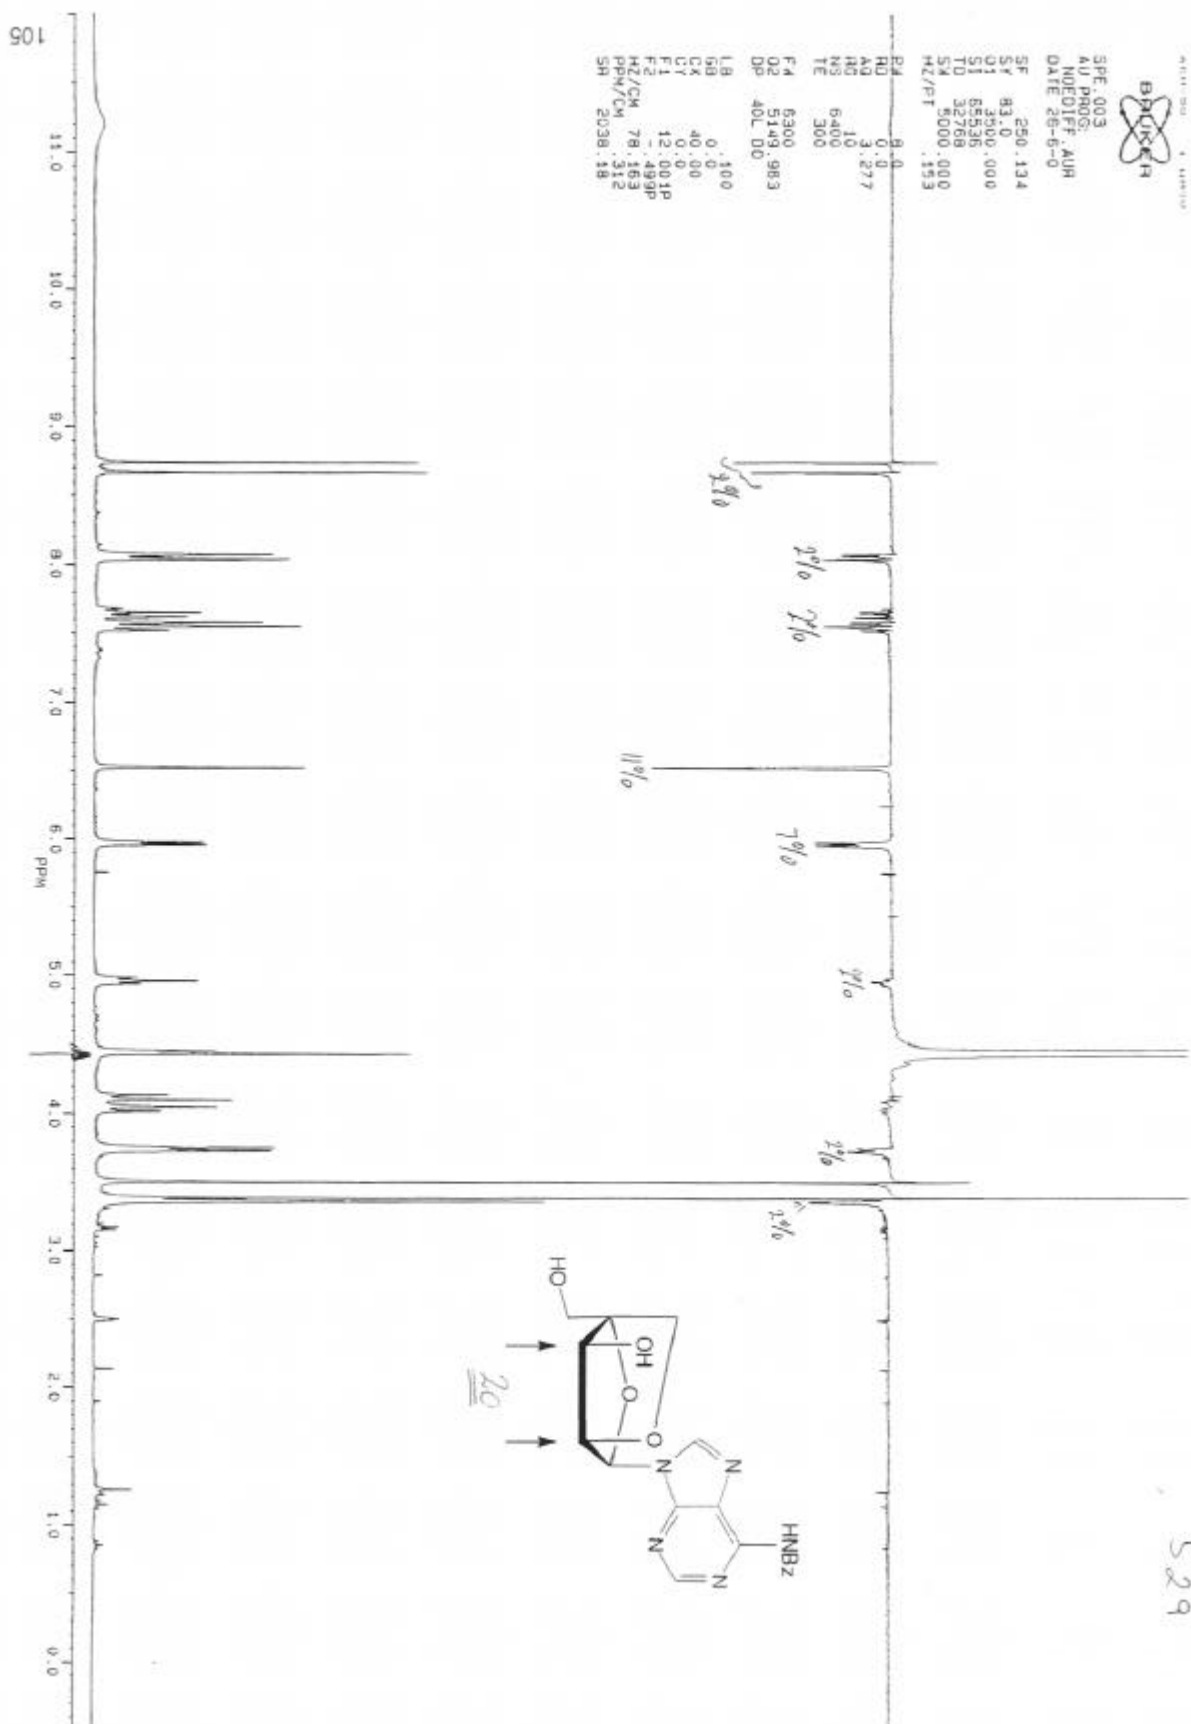

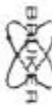

SPE-002  
AU P006  
PROB1FF AUR  
DATE 26-6-0

SF 250.134  
SY 83.0  
O1 3500.000  
S1 65536  
TD 32768  
SM 5000.000  
M2/PT .153

RG 0.0  
AG 3.277  
RG 10  
NS 6300  
TE 300  
FM 6300  
DP 02 5057.800  
DP 40L 00  
LB 0.0  
GB 0.0  
CY 40.00  
CY 0.0  
F1 12.001P  
F2 79.489P  
H2/CN 79.163  
PPM/CN 312  
SR 2038.18

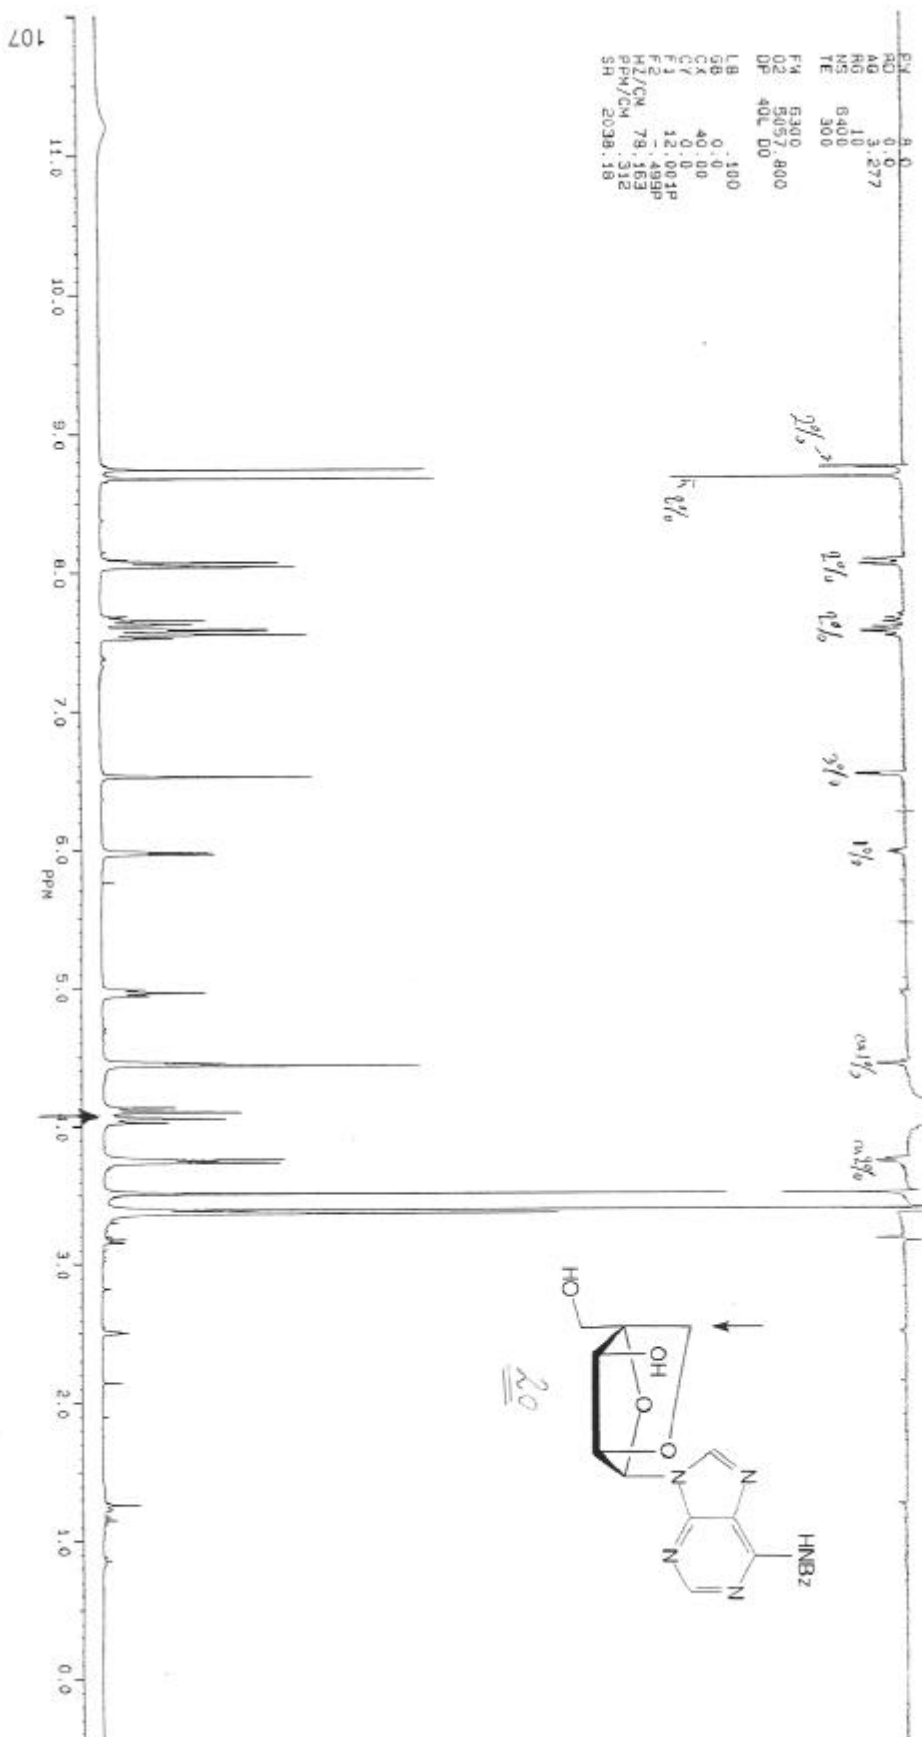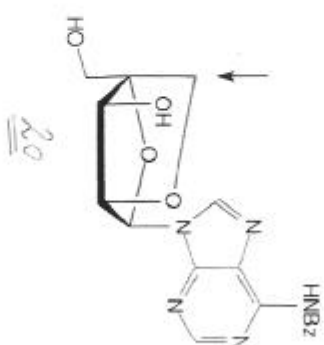

S30

|       |       |      |
|-------|-------|------|
| SE    | 250   | .134 |
| SY    | 83.0  |      |
| Q1    | 3500  | .000 |
| S1    | 65536 |      |
| TD    | 32766 |      |
| SN    | 5000  | .000 |
| H2/PT |       | .153 |

|        |         |       |
|--------|---------|-------|
| PM     |         | 0.0   |
| AD     |         | 3.277 |
| RS     |         | 10.   |
| N5     | 6400    |       |
| TE     | 300     |       |
| FM     | 6300    |       |
| O2     | 621.163 |       |
| DP     | 40L DO  |       |
| LB     |         | 100   |
| GB     | 0.0     |       |
| CX     | 40.00   |       |
| CT     | 0.0     |       |
| F1     | 12.0011 |       |
| F2     | -499    |       |
| H2/CM  | 78.163  |       |
| PDM/CM | 312     |       |
| SR     | 2038.18 |       |

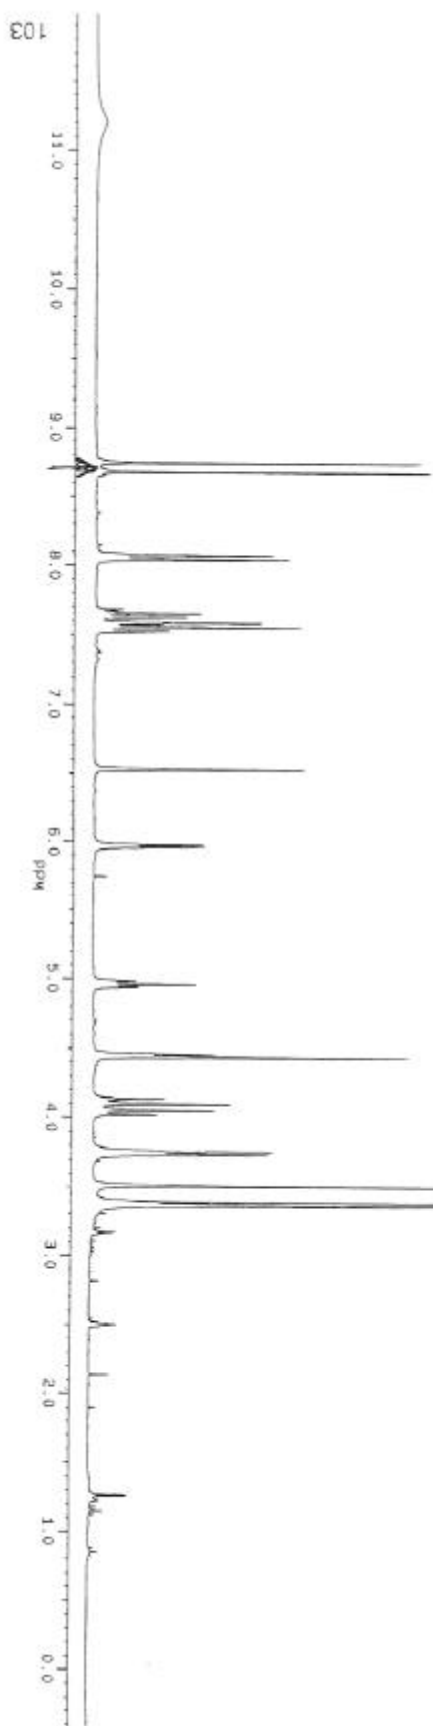

Supplement: Supplementary file 1 [file 5727759]
